# Supplementary material for: Network-based multi-omics integration reveals metabolic at-risk profile within treated HIV-infection
Source: eLife. 2023 Feb 16;12:e82785. doi: 10.7554/eLife.82785 (PMC10017104; doi:10.7554/eLife.82785)
Supplement: Figure 2—source data 1. [file elife-82785-fig2-data1.xlsx]

## Sheet: Sheet1
Figure 2- source data 1. Table of differential lipid abundance analysis SNF-ed by lipids classes by clusters and corrected for transmission mode and CD4 count
BIOCHEMICAL	logFC	P.Value	adj.P.Val	Comp
Triacylglycerols (TAG)	-0.4668	0.00509891	0.0425672	SNF-3-SNF-1
Lysophosphatidylethanolamine (LPE)	-0.29821	0.00608103	0.0425672	SNF-3-SNF-1
Triacylglycerols (TAG)	0.851555	6.55e-07	4.94094e-06	SNF-2-SNF-1
Diacylglycerols (DAG)	0.87746	7.05849e-07	4.94094e-06	SNF-2-SNF-1
Dihydroceramide (DCER)	0.228417	0.00406827	0.0189852	SNF-2-SNF-1
Triacylglycerols (TAG)	-1.31835	5.27269e-16	7.38177e-15	SNF-3-SNF-2
Diacylglycerols (DAG)	-1.05515	2.64003e-11	1.84802e-10	SNF-3-SNF-2
Phosphatidylethanolamine (PE)	-0.443175	2.83732e-06	1.32408e-05	SNF-3-SNF-2
Phosphatidylcholine (PC)	-0.306786	1.32944e-05	4.65303e-05	SNF-3-SNF-2
Lysophosphatidylethanolamine (LPE)	-0.398119	1.88244e-05	5.27082e-05	SNF-3-SNF-2
Cholesteryl Esters (CE)	-0.318095	4.62086e-05	0.00010782	SNF-3-SNF-2
Dihydroceramide (DCER)	-0.27489	6.39745e-05	0.000127949	SNF-3-SNF-2
Ceramide (CER)	-0.314692	0.000920485	0.00161085	SNF-3-SNF-2
Lysophosphatidylcholine (LPC)	-0.237516	0.00389017	0.00605137	SNF-3-SNF-2
Phosphatidylinositol (PI)	-0.454157	0.0134456	0.0188238	SNF-3-SNF-2
