# Supplementary material for: Network-based multi-omics integration reveals metabolic at-risk profile within treated HIV-infection
Source: eLife. 2023 Feb 16;12:e82785. doi: 10.7554/eLife.82785 (PMC10017104; doi:10.7554/eLife.82785)
Supplement: Figure 3—source data 1. [file elife-82785-fig3-data1.xlsx]

## Sheet: Sheet1
Figure 3-source data 1. Alpha diversity indices statistics.
Figure 3-source data 1a: Man Withney U test and Kruskall Wallis statistics between clusters of Alpha diversity indices
Measure	pvalue_SNF-1_SNF-2	FDR_SNF-1_SNF-2	pvalue_SNF-2_SNF-3	FDR_SNF-1_SNF-3	pvalue_SNF-1_SNF-3	FDR_SNF-2_SNF-3	pvalue_KW	FDR_KW
Observed	0.00545278	0.009815	0.299138	0.255068	0.108577	0.448707	0.0250957	0.0472846
Chao1	0.00521782	0.009815	0.222733	0.332623	0.18479	0.448707	0.0262692	0.0472846
se.chao1	0.639921	0.639921	0.140542	0.788337	0.587532	0.448707	0.352975	0.506225
ACE	0.00318088	0.009815	0.294166	0.255068	0.113364	0.448707	0.0203717	0.0472846
se.ACE	0.00231285	0.009815	0.284983	0.255068	0.0934436	0.448707	0.0154544	0.0472846
Shannon	0.218708	0.328061	0.353343	0.788337	0.613151	0.454299	0.393731	0.506225
Simpson	0.577481	0.639921	0.473422	0.804102	0.804102	0.473422	0.721913	0.721913
InvSimpson	0.577481	0.639921	0.473422	0.804102	0.804102	0.473422	0.721913	0.721913
Fisher	0.00545278	0.009815	0.299138	0.255068	0.108577	0.448707	0.0250957	0.0472846
Figure 3-source data 1b: LIMMA Analysis of Alpha diversity indices
Non corrected model	Measure	P.Value	adj.P.Val	Comp	Model corrected for transmission and CD4 count	Measure	P.Value	adj.P.Val	Comp
	se.ACE	0.118336	0.359216	SNF-3-SNF-1		se.ACE	0.15984	0.465218	SNF-3-SNF-1
	Fisher	0.15171	0.359216	SNF-3-SNF-1		Fisher	0.197987	0.465218	SNF-3-SNF-1
	ACE	0.157191	0.359216	SNF-3-SNF-1		ACE	0.201286	0.465218	SNF-3-SNF-1
	Observed	0.159651	0.359216	SNF-3-SNF-1		Observed	0.206764	0.465218	SNF-3-SNF-1
	Chao1	0.214221	0.385597	SNF-3-SNF-1		Chao1	0.275114	0.495206	SNF-3-SNF-1
	se.chao1	0.55152	0.82728	SNF-3-SNF-1		se.chao1	0.552541	0.828812	SNF-3-SNF-1
	Simpson	0.813399	0.917633	SNF-3-SNF-1		Simpson	0.863386	0.951247	SNF-3-SNF-1
	InvSimpson	0.901023	0.917633	SNF-3-SNF-1		Shannon	0.914686	0.951247	SNF-3-SNF-1
	Shannon	0.917633	0.917633	SNF-3-SNF-1		InvSimpson	0.951247	0.951247	SNF-3-SNF-1
	se.ACE	0.00389184	0.0188162	SNF-2-SNF-1		se.ACE	0.0196422	0.112933	SNF-2-SNF-1
	ACE	0.0075042	0.0188162	SNF-2-SNF-1		ACE	0.0467851	0.112933	SNF-2-SNF-1
	Observed	0.00900745	0.0188162	SNF-2-SNF-1		Observed	0.0582588	0.112933	SNF-2-SNF-1
	Fisher	0.00906746	0.0188162	SNF-2-SNF-1		Fisher	0.0610738	0.112933	SNF-2-SNF-1
	Chao1	0.0104534	0.0188162	SNF-2-SNF-1		Chao1	0.0627408	0.112933	SNF-2-SNF-1
	Shannon	0.34135	0.512025	SNF-2-SNF-1		Shannon	0.684555	0.951362	SNF-2-SNF-1
	InvSimpson	0.491678	0.632157	SNF-2-SNF-1		se.chao1	0.830664	0.951362	SNF-2-SNF-1
	se.chao1	0.780415	0.8476	SNF-2-SNF-1		InvSimpson	0.88196	0.951362	SNF-2-SNF-1
	Simpson	0.8476	0.8476	SNF-2-SNF-1		Simpson	0.951362	0.951362	SNF-2-SNF-1
	se.ACE	0.117191	0.301807	SNF-3-SNF-2		se.ACE	0.274486	0.747987	SNF-3-SNF-2
	Chao1	0.11921	0.301807	SNF-3-SNF-2		se.chao1	0.334736	0.747987	SNF-3-SNF-2
	ACE	0.137911	0.301807	SNF-3-SNF-2		Chao1	0.368513	0.747987	SNF-3-SNF-2
	Observed	0.156543	0.301807	SNF-3-SNF-2		ACE	0.407868	0.747987	SNF-3-SNF-2
	Fisher	0.167671	0.301807	SNF-3-SNF-2		Observed	0.464268	0.747987	SNF-3-SNF-2
	se.chao1	0.280339	0.399217	SNF-3-SNF-2		Fisher	0.498658	0.747987	SNF-3-SNF-2
	Shannon	0.310502	0.399217	SNF-3-SNF-2		Shannon	0.72575	0.918951	SNF-3-SNF-2
	InvSimpson	0.502271	0.565055	SNF-3-SNF-2		Simpson	0.892727	0.918951	SNF-3-SNF-2
	Simpson	0.59832	0.59832	SNF-3-SNF-2		InvSimpson	0.918951	0.918951	SNF-3-SNF-2
