# Supplementary material for: Network-based multi-omics integration reveals metabolic at-risk profile within treated HIV-infection
Source: eLife. 2023 Feb 16;12:e82785. doi: 10.7554/eLife.82785 (PMC10017104; doi:10.7554/eLife.82785)
Supplement: Figure 3—source data 2. [file elife-82785-fig3-data2.xlsx]

## Sheet: Sheet1
Figure 3-source data 2. Permutational multivariate analysis of variance at the family level.
pairs	F.Model	R2	p.value	p.adjusted
1	SNF-2 vs SNF-3	1.02429	0.0132983	0.3777	1
2	SNF-2 vs SNF-1	8.65176	0.124215	0.0001	0.0006
3	SNF-2 vs Ctrl	5.60894	0.0957011	0.001	0.006
4	SNF-3 vs SNF-1	4.30856	0.0779005	0.0011	0.0066
5	SNF-3 vs Ctrl	2.97755	0.064761	0.0131	0.0786
6	SNF-1 vs Ctrl	1.63511	0.0551747	0.1117	0.6702
