# Supplementary material for: Network-based multi-omics integration reveals metabolic at-risk profile within treated HIV-infection
Source: eLife. 2023 Feb 16;12:e82785. doi: 10.7554/eLife.82785 (PMC10017104; doi:10.7554/eLife.82785)
Supplement: Figure 5—source data 1. [file elife-82785-fig5-data1.xlsx]

## Sheet: Sheet1
Figure 5-source data 1. Univariate linear regression between clinical parameters and microbiome-derived metabolites differing groups.
Metabolite	Clinical	Estimate	StdError	tStat	pvalue	padjust	CI_Low	CI_high
glycoursodeoxycholic acid sulfate (1)	duration_years	-1.42412	0.401717	-3.54508	0.000611143	0.0183343	-2.22163	-0.62661
lithocholate sulfate (1)	duration_years	-1.46345	0.412086	-3.55131	0.000598515	0.0183343	-2.28154	-0.645353
3*4-dihydroxybutyrate	cluster	0.462697	0.124071	3.7293	0.000328197	0.0122552	0.216351	0.709043
3-ureidopropionate	cluster	0.498227	0.157268	3.16801	0.00207083	0.0443748	0.185968	0.810487
imidazole propionate	cluster	0.839862	0.248127	3.38481	0.00104057	0.025364	0.3472	1.33252
lithocholate sulfate (1)	cluster	-1.37737	0.403097	-3.41698	0.00093716	0.0231324	-2.17773	-0.577016
3-(3-hydroxyphenyl)propionate	GENDER	-1.91142	0.543525	-3.51672	0.000671838	0.0195535	-2.99046	-0.83239
3-(3-hydroxyphenyl)propionate sulfate	GENDER	-1.71019	0.496868	-3.44195	0.000860261	0.0223668	-2.6966	-0.723787
glycoursodeoxycholic acid sulfate (1)	GENDER	-1.51309	0.476026	-3.17859	0.00199786	0.043287	-2.45812	-0.568061
deoxycholic acid 12-sulfate*	METS	-1.09883	0.264218	-4.15881	7.01295e-05	0.00375291	-1.62337	-0.574295
glycolithocholate	METS	-0.794695	0.223491	-3.55582	0.000589541	0.0183343	-1.23838	-0.351009
glycoursodeoxycholic acid sulfate (1)	METS	-1.60576	0.229287	-7.0033	3.55324e-10	3.46441e-07	-2.06096	-1.15057
lithocholate sulfate (1)	METS	-1.10841	0.24034	-4.61185	1.24442e-05	0.000898749	-1.58554	-0.631276
glycoursodeoxycholic acid sulfate (1)	Ethnic	-1.83187	0.49269	-3.71811	0.000339374	0.0122552	-2.80999	-0.85376
glycoursodeoxycholic acid sulfate (1)	Origin	-1.48083	0.404524	-3.66068	0.000413371	0.0138978	-2.28391	-0.677749
glycoursodeoxycholic acid sulfate (1)	Transm_mode	-1.29577	0.216187	-5.99376	3.76403e-08	1.22331e-05	-1.72501	-0.866528
lithocholate sulfate (1)	Transm_mode	-0.742753	0.223076	-3.32959	0.00124349	0.0292144	-1.18568	-0.299829
deoxycholic acid 12-sulfate*	ob6	-7.03345	1.73543	-4.05286	0.000103474	0.00517368	-10.4787	-3.58819
lithocholate sulfate (1)	ob6	-4.9913	1.55821	-3.20322	0.00184997	0.0414648	-8.08474	-1.89786
glycoursodeoxycholic acid sulfate (1)	curr_smoking	-1.378	0.254181	-5.42132	1.417e-06	0.000153512	-1.8876	-0.868394
deoxycholic acid 12-sulfate*	central_obesity	-1.14925	0.313375	-3.66734	0.000404056	0.013823	-1.77138	-0.527125
glycoursodeoxycholic acid sulfate (1)	central_obesity	-1.58489	0.269146	-5.88859	5.86073e-08	1.43393e-05	-2.11922	-1.05057
lithocholate sulfate (1)	central_obesity	-1.24877	0.277863	-4.4942	1.96909e-05	0.00127991	-1.8004	-0.697145
glycoursodeoxycholic acid sulfate (1)	hypertension	-1.22541	0.247723	-4.94671	3.25383e-06	0.000333946	-1.7172	-0.73362
lithocholate sulfate (1)	hypertension	-0.884517	0.257489	-3.43517	0.000879616	0.0225691	-1.3957	-0.373338
deoxycholic acid 12-sulfate*	VAT	-1.65545	0.317901	-5.20742	1.16188e-06	0.000133275	-2.28682	-1.02407
glycoursodeoxycholic acid sulfate (1)	VAT	-1.64477	0.285937	-5.7522	1.14276e-07	2.47598e-05	-2.21266	-1.07687
lithocholate sulfate (1)	VAT	-1.57954	0.289684	-5.45263	4.14401e-07	5.77201e-05	-2.15488	-1.0042
glycoursodeoxycholic acid sulfate (1)	SAT	-1.48878	0.321847	-4.62575	1.21742e-05	0.000898749	-2.128	-0.849567
lithocholate sulfate (1)	SAT	-1.18308	0.337121	-3.50937	0.000697365	0.0199878	-1.85263	-0.513531
glycoursodeoxycholic acid sulfate (1)	Simpson	-1.91903	0.30635	-6.26418	1.08707e-08	5.29946e-06	-2.52721	-1.31085
glycoursodeoxycholic acid sulfate (1)	CD4	-1.07197	0.276608	-3.8754	0.000201867	0.0085574	-1.6215	-0.522436
glycoursodeoxycholic acid sulfate (1)	CD8	-1.59898	0.283588	-5.63839	1.83164e-07	3.45282e-05	-2.16213	-1.03583
glycolithocholate	ratio_CD4_CD8	-1.53108	0.365565	-4.18827	6.33574e-05	0.00352991	-2.25692	-0.805246
glycolithocholate	CD4_ART	-0.91073	0.272269	-3.34496	0.00122637	0.0291637	-1.45207	-0.369385
glycoursodeoxycholic acid sulfate (1)	CD4_ART	-1.14471	0.290278	-3.94348	0.000164491	0.00763708	-1.72186	-0.567556
lithocholate sulfate (1)	CD4_ART	-1.14289	0.302623	-3.77659	0.000293924	0.011697	-1.74458	-0.541189
glycoursodeoxycholic acid sulfate (1)	CD4_nadir	-1.22695	0.264246	-4.64321	1.13696e-05	0.000898749	-1.75176	-0.702133
lithocholate sulfate (1)	CD4_nadir	-0.929012	0.271244	-3.42501	0.000920197	0.0230049	-1.46772	-0.390298
glycoursodeoxycholic acid sulfate (1)	ob6	-1.32467	0.332588	-3.98291	0.000143099	0.00680594	-1.98594	-0.663393
glycoursodeoxycholic acid sulfate (1)	alcohol	-1.47416	0.378841	-3.89123	0.000194814	0.00844192	-2.22715	-0.72117
lithocholate sulfate (1)	alcohol	-1.46466	0.390911	-3.74679	0.000321475	0.0122552	-2.24164	-0.687683
glycolithocholate	CD4_nadir	-1.34949	0.291246	-4.63351	1.15514e-05	0.000898749	-1.92777	-0.771217
glycoursodeoxycholic acid sulfate (1)	CD4_nadir	-1.11491	0.309344	-3.6041	0.000503358	0.0166364	-1.72912	-0.500698
lithocholate sulfate (1)	CD4_nadir	-1.01021	0.322784	-3.12969	0.00233131	0.04914	-1.65111	-0.369317
glycolithocholate	CD4_ART	-1.38654	0.294117	-4.71423	9.03409e-06	0.000765934	-1.97103	-0.802041
glycoursodeoxycholic acid sulfate (1)	CD4_ART	-1.06405	0.310136	-3.43091	0.000918139	0.0230049	-1.68038	-0.447718
glycoursodeoxycholic acid sulfate (1)	CD8	-2.02001	0.381084	-5.30068	7.60425e-07	9.88474e-05	-2.77666	-1.26336
acetoacetate	VL	1.10258	0.281508	3.91668	0.000169052	0.00766633	0.543715	1.66144
glycolithocholate	VL_ART	-0.723552	0.201244	-3.59539	0.000562099	0.0182682	-1.12412	-0.322985
glycoursodeoxycholic acid sulfate (1)	VL_ART	-1.16728	0.206133	-5.66272	2.31697e-07	3.76507e-05	-1.57757	-0.756977
lithocholate sulfate (1)	VL_ART	-0.846548	0.217565	-3.89102	0.000207117	0.00859313	-1.2796	-0.413497
glycoursodeoxycholic acid sulfate (1)	H2_53c	-1.80945	0.341273	-5.30204	8.11055e-07	9.88474e-05	-2.48745	-1.13145
glycolithocholate	H2_54	-1.44024	0.435553	-3.30669	0.00140892	0.0323223	-2.30685	-0.573625
glycolithocholate	H2_55	-1.30731	0.379065	-3.44877	0.000844542	0.0223668	-2.05995	-0.554664
imidazole propionate	H2_55	0.963985	0.247966	3.88757	0.000188627	0.00835962	0.471642	1.45633
glycolithocholate	m2_02a	-0.776883	0.188391	-4.12378	7.98089e-05	0.00409546	-1.15089	-0.402879
glycoursodeoxycholic acid sulfate (1)	m2_02a	-1.45618	0.194379	-7.49142	3.49657e-11	6.81831e-08	-1.84207	-1.07029
lithocholate sulfate (1)	m2_02a	-0.925484	0.204449	-4.52671	1.73573e-05	0.00116713	-1.33137	-0.5196
glycoursodeoxycholic acid sulfate (1)	cum_smoking	-1.22434	0.32207	-3.80148	0.000379159	0.0132029	-1.87062	-0.578062
glycolithocholate	alcohol	-0.915221	0.219728	-4.16525	7.12091e-05	0.00375291	-1.35175	-0.478693
glycoursodeoxycholic acid sulfate (1)	alcohol	-1.30832	0.232008	-5.63915	1.94774e-07	3.45282e-05	-1.76925	-0.847401
lithocholate sulfate (1)	alcohol	-0.970108	0.241514	-4.01678	0.000122115	0.00595311	-1.44992	-0.490299
glycoursodeoxycholic acid sulfate (1)	AGE	-1.39812	0.237249	-5.89305	5.88277e-08	1.43393e-05	-1.86918	-0.927057
lithocholate sulfate (1)	AGE	-1.103	0.245826	-4.48692	2.04501e-05	0.00128637	-1.59109	-0.614908
glycocholenate sulfate*	drug_1	-0.449496	0.139414	-3.22418	0.00191005	0.042325	-0.72748	-0.171513
glycoursodeoxycholic acid sulfate (1)	drug_1	-1.83132	0.295505	-6.19726	3.35281e-08	1.22331e-05	-2.42054	-1.2421
lithocholate sulfate (1)	drug_1	-1.11241	0.314894	-3.53266	0.000727759	0.0199878	-1.7403	-0.484533
glycoursodeoxycholate	drug_3	-1.31343	0.412304	-3.18559	0.0023436	0.04914	-2.13905	-0.487805
glycoursodeoxycholic acid sulfate (1)	drug_3	-1.67375	0.441524	-3.79084	0.000364551	0.012925	-2.55788	-0.78961
lithocholate sulfate (1)	drug_bis	-1.47354	0.415698	-3.54474	0.000716196	0.0199878	-2.30305	-0.644029
2-hydroxyphenylacetate	eGFR	1.5907	0.357464	4.44995	2.38075e-05	0.00145077	0.880844	2.30055
3-aminoisobutyrate	eGFR	1.33141	0.401843	3.31325	0.00131489	0.0305243	0.533427	2.12939
glycolithocholate	alat	-1.24725	0.334875	-3.72452	0.000333653	0.0122552	-1.91215	-0.582346
glycoursodeoxycholic acid sulfate (1)	alat	-1.23979	0.360038	-3.44349	0.000859294	0.0223668	-1.95465	-0.524924
lithocholate sulfate (1)	alat	-1.7316	0.358575	-4.82911	5.30693e-06	0.000492786	-2.44356	-1.01964
1-methyl-5-imidazoleacetate	creatinin	-2.89576	0.827945	-3.49752	0.000722131	0.0199878	-4.53989	-1.25162
2-hydroxyphenylacetate	creatinin	-1.87377	0.343772	-5.45061	4.10108e-07	5.77201e-05	-2.55643	-1.1911
3-aminoisobutyrate	creatinin	-1.41862	0.401183	-3.53608	0.000635319	0.0187708	-2.21529	-0.621946
