# Supplementary material for: Network-based multi-omics integration reveals metabolic at-risk profile within treated HIV-infection
Source: eLife. 2023 Feb 16;12:e82785. doi: 10.7554/eLife.82785 (PMC10017104; doi:10.7554/eLife.82785)
Supplement: Supplementary file 1. [file elife-82785-supp1.xlsx]

## Sheet: Sheet1
Supplementary file 1. Table of differential lipid abundance analysis on individual lipids abundances between clusters corrected for transmission mode and CD4 count
Comparisions	BIOCHEMICAL	logFC	P.Value	adj.P.Val
SNF-2-SNF-1	TAG56:7-FA18:2	1.36513	1.53096e-11	8.43876e-09
	TAG52:5-FA16:0	1.64832	1.7526e-11	8.43876e-09
	TAG56:8-FA22:5	1.4707	3.04231e-11	9.65339e-09
	TAG52:4-FA16:0	1.45859	4.52466e-11	9.65339e-09
	TAG56:7-FA22:5	1.28159	5.01214e-11	9.65339e-09
	TAG52:5-FA18:2	1.593	7.99376e-11	1.15539e-08
	TAG52:5-FA18:3	1.55094	9.35615e-11	1.15539e-08
	TAG52:6-FA18:2	1.66377	9.59827e-11	1.15539e-08
	TAG52:4-FA20:0	1.42278	1.45787e-10	1.45512e-08
	TAG52:4-FA18:3	1.46855	1.62735e-10	1.45512e-08
	TAG52:4-FA18:2	1.34239	1.66213e-10	1.45512e-08
	TAG56:8-FA16:0	1.57281	1.91124e-10	1.53377e-08
	DAG(18:2/18:3)	1.65265	2.33422e-10	1.57793e-08
	TAG52:4-FA22:1	1.34132	2.44049e-10	1.57793e-08
	TAG55:1-FA16:0	1.54856	2.72265e-10	1.57793e-08
	TAG56:8-FA18:2	1.52434	2.74925e-10	1.57793e-08
	DAG(18:2/22:5)	1.32286	2.78554e-10	1.57793e-08
	TAG53:4-FA17:0	1.35365	3.99437e-10	2.02806e-08
	TAG52:5-FA16:1	1.41856	4.00137e-10	2.02806e-08
	TAG52:5-FA18:1	1.42733	5.91062e-10	2.84596e-08
	TAG56:8-FA18:3	1.49144	6.98831e-10	3.16363e-08
	TAG52:6-FA16:1	1.52235	7.2274e-10	3.16363e-08
	TAG52:6-FA18:3	1.75605	1e-09	3.87744e-08
	TAG53:5-FA18:3	1.27607	1e-09	3.87744e-08
	TAG56:6-FA18:2	1.28112	1e-09	3.87744e-08
	TAG52:4-FA18:1	1.3264	1e-09	3.87744e-08
	DAG(18:1/18:2)	1.26332	1.10849e-09	3.95362e-08
	TAG52:3-FA16:0	1.13569	1.28781e-09	4.37975e-08
	TAG52:3-FA18:2	1.11762	1.37416e-09	4.37975e-08
	TAG56:7-FA16:0	1.36246	1.40468e-09	4.37975e-08
	TAG53:4-FA18:2	1.17784	1.41236e-09	4.37975e-08
	TAG58:7-FA18:2	1.17772	1.45537e-09	4.37975e-08
	TAG56:7-FA22:4	1.28789	1.54817e-09	4.51784e-08
	TAG58:8-FA18:2	1.29712	2.21334e-09	6.26897e-08
	TAG56:7-FA18:3	1.44003	2.35298e-09	6.32781e-08
	TAG56:6-FA18:0	1.25315	2.36554e-09	6.32781e-08
	TAG56:9-FA18:3	1.69381	2.43808e-09	6.3456e-08
	TAG58:9-FA22:5	1.33789	2.53847e-09	6.43301e-08
	TAG51:4-FA15:0	1.33578	2.72573e-09	6.73046e-08
	TAG52:3-FA20:0	1.2084	3.20406e-09	7.48087e-08
	TAG56:6-FA16:0	1.18693	3.3234e-09	7.48087e-08
	TAG54:4-FA18:0	1.40387	3.32933e-09	7.48087e-08
	TAG52:6-FA16:0	1.48487	3.34037e-09	7.48087e-08
	TAG54:6-FA16:0	1.2495	3.47177e-09	7.6e-08
	TAG53:4-FA18:3	1.37142	3.56352e-09	7.62594e-08
	TAG53:3-FA17:0	1.23096	3.68113e-09	7.70637e-08
	TAG52:3-FA18:3	1.3384	4.24086e-09	8.68924e-08
	TAG56:7-FA18:0	1.30625	5e-09	9.94268e-08
	TAG53:3-FA18:2	1.18239	6.61437e-09	1.29097e-07
	TAG54:6-FA18:1	1.71698	6.8137e-09	1.29097e-07
	DAG(18:0/18:3)	1.14808	6.85526e-09	1.29097e-07
	TAG56:6-FA18:1	1.10883	7e-09	1.29097e-07
	TAG54:5-FA20:2	1.13235	7.13524e-09	1.29646e-07
	TAG54:5-FA18:0	1.45727	7.33009e-09	1.3072e-07
	TAG56:7-FA18:1	1.26655	8.36036e-09	1.46382e-07
	TAG51:4-FA18:2	1.27545	8.74843e-09	1.47947e-07
	TAG54:7-FA18:2	1.87321	8.75701e-09	1.47947e-07
	TAG51:5-FA18:2	1.43261	9.44785e-09	1.56867e-07
	TAG51:3-FA18:2	1.15414	1.05913e-08	1.72872e-07
	TAG54:6-FA18:2	1.76408	1.1058e-08	1.77e-07
	TAG54:7-FA20:4	1.24171	1.12117e-08	1.77e-07
	TAG56:6-FA22:5	1.13112	1.17224e-08	1.79374e-07
	TAG54:4-FA18:3	1.51488	1.17348e-08	1.79374e-07
	TAG51:4-FA18:3	1.29113	1.21752e-08	1.80574e-07
	TAG55:2-FA18:2	1.40393	1.23466e-08	1.80574e-07
	TAG58:8-FA22:5	1.17196	1.24897e-08	1.80574e-07
	TAG56:6-FA18:3	1.51602	1.25633e-08	1.80574e-07
	TAG54:5-FA18:1	1.54585	1.27823e-08	1.81e-07
	TAG52:4-FA18:0	1.20218	1.31533e-08	1.8171e-07
	TAG54:5-FA18:2	1.56399	1.32084e-08	1.8171e-07
	TAG54:6-FA18:3	1.86485	1.35692e-08	1.84e-07
	TAG51:4-FA16:0	0.476663	1.48079e-08	1.98056e-07
	TAG56:7-FA20:4	1.18483	1.51715e-08	2.00139e-07
	TAG58:7-FA22:4	1.12585	1.62512e-08	2.11485e-07
	TAG54:5-FA18:3	1.64337	1.73257e-08	2.22462e-07
	TAG50:4-FA18:2	1.18585	1.81268e-08	2.29685e-07
	TAG51:3-FA15:0	1.18461	2.14403e-08	2.68143e-07
	TAG56:8-FA20:4	1.28948	2.20834e-08	2.68829e-07
	TAG51:5-FA18:3	1.38091	2.22789e-08	2.68829e-07
	TAG54:7-FA22:5	1.13607	2.23326e-08	2.68829e-07
	DAG(18:2/20:4)	1.31583	2.4794e-08	2.94774e-07
	TAG56:6-FA20:2	1.16136	2.6e-08	3.02246e-07
	TAG54:5-FA22:1	1.55751	2.60503e-08	3.02246e-07
	TAG52:2-FA18:2	1.15623	2.76386e-08	3.14818e-07
	TAG51:3-FA18:1	0.623937	2.77876e-08	3.14818e-07
	TAG58:6-FA18:0	1.12035	2.88023e-08	3.22518e-07
	TAG50:4-FA14:0	1.29821	3.04498e-08	3.334e-07
	TAG53:0-FA16:0	1.21809	3.04665e-08	3.334e-07
	TAG52:3-FA18:1	0.954118	3.23726e-08	3.46548e-07
	TAG54:3-FA18:2	1.20726	3.23876e-08	3.46548e-07
	TAG56:5-FA22:5	1.08169	3.30957e-08	3.50232e-07
	TAG58:10-FA22:5	1.40733	3.94565e-08	4.13e-07
	TAG56:5-FA18:2	1.28202	4.34755e-08	4.46231e-07
	TAG51:4-FA18:1	0.768392	4.4e-08	4.46231e-07
	TAG52:4-FA16:1	1.19251	4.40568e-08	4.46231e-07
	TAG54:4-FA18:2	1.30128	4.44841e-08	4.46231e-07
	TAG56:6-FA22:4	1.14614	4.54295e-08	4.51e-07
	TAG54:7-FA20:5	1.38038	4.8e-08	4.71468e-07
	TAG54:8-FA18:2	1.76944	5.1072e-08	4.96791e-07
	TAG55:1-FA18:1	1.21449	5.52837e-08	5.32382e-07
	TAG54:4-FA18:1	1.25049	5.64301e-08	5.34103e-07
	DAG(18:1/22:5)	1.16129	5.65717e-08	5.34103e-07
	TAG54:3-FA18:0	1.17181	5.89193e-08	5.50867e-07
	DAG(16:0/18:3)	1.10903	6.38562e-08	5.91284e-07
	TAG56:8-FA18:1	1.20922	6.9e-08	6.33e-07
	TAG52:3-FA18:0	1.13297	7.14853e-08	6.49437e-07
	TAG56:8-FA22:6	1.48625	7.32288e-08	6.59059e-07
	TAG50:3-FA14:0	1.11281	7.7155e-08	6.88e-07
	TAG54:7-FA18:3	2.00316	8.5e-08	7.51155e-07
	TAG58:7-FA18:0	1.24653	9.53039e-08	8.34342e-07
	TAG56:9-FA22:6	1.64257	9.62406e-08	8.35e-07
	DAG(18:2/22:6)	1.61748	9.87173e-08	8.48793e-07
	TAG50:4-FA18:3	1.18125	1.02547e-07	8.73921e-07
	TAG58:7-FA18:1	1.08009	1.05221e-07	8.8884e-07
	TAG54:5-FA16:0	1.08083	1.0986e-07	9.2e-07
	TAG54:6-FA20:4	1.11303	1.1085e-07	9.20247e-07
	TAG52:5-FA22:5	1.07614	1.19461e-07	9.83254e-07
	TAG52:6-FA18:1	1.33858	1.29654e-07	1.057e-06
	TAG50:5-FA18:3	1.29259	1.30615e-07	1.057e-06
	TAG52:3-FA22:1	1.10516	1.36348e-07	1.09419e-06
	TAG50:5-FA14:1	1.13063	1.51927e-07	1.20914e-06
	TAG53:3-FA18:1	0.757578	1.71414e-07	1.353e-06
	TAG55:7-FA15:0	1.15589	1.74604e-07	1.36261e-06
	TAG56:6-FA20:4	1.05232	1.76252e-07	1.36261e-06
	TAG54:7-FA18:1	1.588	1.7687e-07	1.36261e-06
	DAG(18:2/20:5)	1.59648	1.78361e-07	1.36318e-06
	TAG58:6-FA22:5	1.03279	1.83506e-07	1.39147e-06
	DAG(18:0/18:2)	0.783109	1.87488e-07	1.41056e-06
	TAG54:3-FA16:0	1.02851	1.89421e-07	1.41256e-06
	TAG51:3-FA16:0	0.36926	1.90688e-07	1.41256e-06
	TAG50:4-FA16:0	1.18753	1.99708e-07	1.46808e-06
	TAG53:2-FA18:2	1.0634	2.05239e-07	1.49731e-06
	TAG52:8-FA18:2	1.0188	2.06929e-07	1.49829e-06
	TAG54:2-FA18:2	1.11022	2.09688e-07	1.50693e-06
	TAG50:5-FA18:2	1.345	2.12221e-07	1.51385e-06
	TAG53:4-FA18:1	0.251744	2.14514e-07	1.51895e-06
	TAG54:4-FA22:1	1.33664	2.16834e-07	1.52417e-06
	TAG53:6-FA18:2	0.254689	2.19e-07	1.52818e-06
	TAG54:4-FA20:2	0.966814	2.23e-07	1.54508e-06
	TAG58:7-FA22:5	0.993975	2.27408e-07	1.56424e-06
	TAG54:6-FA20:5	1.2867	2.29666e-07	1.56857e-06
	TAG55:5-FA18:1	0.983341	2.36843e-07	1.6062e-06
	TAG56:3-FA18:0	1.09275	2.41841e-07	1.62862e-06
	TAG50:5-FA14:0	1.38726	2.54677e-07	1.70315e-06
	TAG54:8-FA20:5	1.4418	2.81476e-07	1.86939e-06
	TAG56:7-FA22:6	1.34329	2.87699e-07	1.89763e-06
	TAG56:7-FA20:3	1.09697	2.95721e-07	1.93728e-06
	TAG58:10-FA18:2	1.45178	3.23221e-07	2.07717e-06
	TAG56:8-FA20:5	1.41913	3.2473e-07	2.07717e-06
	TAG55:6-FA20:4	0.809936	3.255e-07	2.07717e-06
	TAG54:8-FA18:3	2.03303	3.25704e-07	2.07717e-06
	TAG50:3-FA18:2	1.00133	3.87158e-07	2.45285e-06
	TAG54:4-FA20:1	1.27596	4.02598e-07	2.534e-06
	TAG56:7-FA16:1	1.06972	4.49616e-07	2.81156e-06
	TAG57:3-FA18:2	1.39728	4.6425e-07	2.87315e-06
	TAG56:5-FA18:1	1.03177	4.65433e-07	2.87315e-06
	DAG(16:0/18:2)	0.81955	4.68768e-07	2.87531e-06
	TAG56:9-FA20:4	1.30053	4.90688e-07	2.99071e-06
	TAG54:3-FA18:3	1.14122	5.11208e-07	3.09618e-06
	TAG51:3-FA18:3	1.10953	5.4183e-07	3.26114e-06
	TAG54:4-FA16:0	1.04586	5.58194e-07	3.326e-06
	TAG53:6-FA20:4	0.954013	5.60885e-07	3.326e-06
	TAG50:4-FA18:1	1.15417	5.63e-07	3.326e-06
	TAG54:6-FA20:3	1.07307	5.66762e-07	3.328e-06
	TAG50:4-FA14:1	1.01679	5.89886e-07	3.44279e-06
	TAG53:5-FA18:2	0.158232	6.11e-07	3.54466e-06
	TAG51:3-FA17:0	1.01286	7.06707e-07	4.07291e-06
	TAG56:4-FA18:0	1.02978	7.10539e-07	4.07291e-06
	TAG56:5-FA18:0	1.04526	7.26157e-07	4.13781e-06
	TAG56:5-FA20:2	1.0078	7.49557e-07	4.246e-06
	TAG56:9-FA20:5	1.50871	8.11765e-07	4.57013e-06
	TAG56:6-FA22:6	1.28611	8.16595e-07	4.57013e-06
	DAG(18:1/22:6)	1.37859	8.21e-07	4.57013e-06
	TAG53:4-FA16:0	0.951981	9.53924e-07	5.27947e-06
	TAG58:9-FA18:2	1.30527	1.07909e-06	5.93808e-06
	TAG57:2-FA18:1	1.26705	1.09835e-06	6.00973e-06
	DAG(18:1/20:5)	1.44004	1.14149e-06	6.2105e-06
	TAG50:5-FA18:1	1.16413	1.20422e-06	6.515e-06
	TAG50:3-FA18:3	1.09859	1.26128e-06	6.78553e-06
	TAG58:9-FA18:1	1.27117	1.32248e-06	7.07526e-06
	TAG55:4-FA18:2	1.18498	1.79567e-06	9.55376e-06
	TAG58:10-FA22:6	1.54944	1.8404e-06	9.738e-06
	TAG56:7-FA20:5	1.23694	1.85325e-06	9.75234e-06
	TAG55:5-FA18:2	1.21023	2.00583e-06	1.04979e-05
	TAG53:2-FA17:0	0.996591	2.02775e-06	1.05552e-05
	TAG52:5-FA14:0	1.04363	2.06357e-06	1.0684e-05
	DAG(18:2/22:4)	0.691278	2.17076e-06	1.11788e-05
	DAG(18:1/18:1)	0.997258	2.25335e-06	1.15424e-05
	TAG58:6-FA18:1	0.926657	2.38391e-06	1.21466e-05
	TAG53:3-FA16:0	0.943668	2.5353e-06	1.28499e-05
	TAG51:4-FA16:1	0.98151	2.60908e-06	1.31547e-05
	TAG54:3-FA20:1	1.03764	2.64678e-06	1.3211e-05
	TAG56:4-FA18:1	1.05495	2.65073e-06	1.3211e-05
	TAG54:8-FA22:6	1.29987	2.67375e-06	1.3211e-05
	TAG56:6-FA20:3	0.944855	2.67512e-06	1.3211e-05
	TAG55:6-FA18:1	0.311139	2.71984e-06	1.33633e-05
	TAG50:3-FA16:0	1.0154	2.74512e-06	1.3419e-05
	TAG56:5-FA16:0	1.02041	2.78316e-06	1.35363e-05
	TAG51:2-FA18:2	0.942176	2.87059e-06	1.38914e-05
	TAG54:3-FA18:1	0.97293	2.94459e-06	1.4068e-05
	TAG55:3-FA18:2	1.12135	2.94869e-06	1.4068e-05
	TAG50:3-FA18:1	0.902723	2.95093e-06	1.4068e-05
	TAG53:6-FA18:3	0.153831	3.07365e-06	1.45809e-05
	TAG58:6-FA22:4	0.906946	3.31172e-06	1.56333e-05
	TAG56:4-FA18:2	1.31047	3.709e-06	1.74232e-05
	TAG54:6-FA16:1	0.999921	3.79983e-06	1.77633e-05
	TAG56:5-FA20:1	1.52525	3.82052e-06	1.77737e-05
	TAG54:2-FA20:0	0.872647	3.87953e-06	1.79615e-05
	TAG54:7-FA16:1	1.15058	3.90481e-06	1.7992e-05
	TAG52:2-FA16:0	0.824023	4.05318e-06	1.85867e-05
	TAG56:3-FA20:0	1.26179	4.16039e-06	1.89879e-05
	DAG(18:1/20:4)	1.05493	4.19374e-06	1.90499e-05
	TAG54:2-FA18:1	1.04279	4.34616e-06	1.96495e-05
	DAG(18:1/20:1)	0.950605	4.40363e-06	1.97779e-05
	TAG58:9-FA22:6	1.379	4.42095e-06	1.97779e-05
	TAG54:2-FA18:0	1.06629	4.43615e-06	1.97779e-05
	TAG52:2-FA18:1	0.71569	4.486e-06	1.98828e-05
	TAG54:8-FA20:4	1.12603	4.501e-06	1.98828e-05
	TAG54:5-FA20:5	1.17207	4.6153e-06	2.02947e-05
	TAG56:10-FA18:2	1.10657	4.75275e-06	2.08041e-05
	TAG53:2-FA18:1	0.949004	4.79042e-06	2.08741e-05
	TAG56:8-FA16:1	1.17547	4.81906e-06	2.09043e-05
	TAG50:5-FA16:0	1.13132	4.95793e-06	2.14103e-05
	TAG52:4-FA20:2	0.822548	5.022e-06	2.15901e-05
	TAG55:5-FA20:4	0.895101	5.23542e-06	2.24076e-05
	DAG(15:0/18:2)	0.617233	5.32349e-06	2.26837e-05
	TAG54:6-FA22:5	0.95599	5.45358e-06	2.31357e-05
	TAG60:10-FA22:5	1.01551	5.59561e-06	2.35602e-05
	TAG55:7-FA22:6	1.13963	5.60259e-06	2.35602e-05
	TAG55:4-FA18:1	1.05156	5.66133e-06	2.37037e-05
	TAG58:7-FA22:6	1.28704	5.80306e-06	2.4192e-05
	TAG56:6-FA20:5	1.19417	5.967e-06	2.47299e-05
	TAG52:2-FA18:0	0.958384	5.98346e-06	2.47299e-05
	TAG58:8-FA18:1	1.14324	6.45182e-06	2.65517e-05
	TAG53:2-FA18:0	0.747978	8.248e-06	3.37994e-05
	TAG51:2-FA15:0	0.9093	8.79288e-06	3.58794e-05
	DAG(16:1/18:3)	1.03057	8.93656e-06	3.61739e-05
	TAG52:6-FA14:0	1.0835	8.94018e-06	3.61739e-05
	TAG54:5-FA20:4	0.954015	9.69813e-06	3.90008e-05
	TAG50:2-FA18:2	0.952515	9.71984e-06	3.90008e-05
	TAG60:11-FA22:5	1.2298	9.77635e-06	3.90648e-05
	TAG56:5-FA20:4	0.965428	9.92255e-06	3.94852e-05
	DAG(16:1/18:2)	0.964809	1.00275e-05	3.97387e-05
	TAG49:3-FA15:0	0.926595	1.1019e-05	4.3489e-05
	TAG49:3-FA18:2	0.884049	1.12273e-05	4.41304e-05
	TAG56:4-FA20:1	1.33029	1.13488e-05	4.44264e-05
	TAG53:7-FA18:3	0.239448	1.1775e-05	4.59083e-05
	DAG(16:0/22:5)	0.737589	1.24473e-05	4.83337e-05
	TAG50:5-FA16:1	1.1399	1.31467e-05	5.08049e-05
	TAG54:2-FA16:0	0.972564	1.31892e-05	5.08049e-05
	TAG56:3-FA18:2	1.28947	1.32733e-05	5.09252e-05
	TAG54:5-FA22:5	0.908207	1.48274e-05	5.66618e-05
	DAG(14:0/18:2)	0.772384	1.5519e-05	5.90704e-05
	TAG56:2-FA18:0	1.1605	1.55848e-05	5.90872e-05
	TAG55:7-FA18:1	0.553336	1.66176e-05	6.2756e-05
	TAG56:3-FA20:2	0.861992	1.75639e-05	6.60703e-05
	TAG56:4-FA20:4	0.95457	1.79202e-05	6.71484e-05
	TAG54:2-FA20:1	0.983954	1.81891e-05	6.78918e-05
	DAG(18:2/20:3)	0.953222	1.83862e-05	6.83628e-05
	TAG56:5-FA22:4	0.973371	1.91417e-05	7.08978e-05
	TAG52:2-FA20:0	0.769087	1.97617e-05	7.29137e-05
	TAG52:4-FA14:0	0.93275	2.02543e-05	7.44463e-05
	TAG55:3-FA18:1	0.986313	2.03347e-05	7.44576e-05
	DAG(18:0/22:6)	0.741871	2.15909e-05	7.87578e-05
	TAG57:8-FA22:6	0.968389	2.20238e-05	8.00335e-05
	TAG51:2-FA18:1	0.859829	2.22649e-05	8.06055e-05
	TAG52:7-FA20:5	1.14202	2.24614e-05	8.10125e-05
	TAG49:3-FA16:0	0.888976	2.29514e-05	8.24709e-05
	TAG54:5-FA20:3	0.895999	2.3718e-05	8.47271e-05
	DAG(18:1/22:4)	0.764239	2.37553e-05	8.47271e-05
	TAG54:4-FA16:1	0.87804	2.39467e-05	8.50948e-05
	TAG58:8-FA22:6	1.20726	2.43494e-05	8.62075e-05
	TAG54:3-FA20:2	0.853043	2.4776e-05	8.73967e-05
	TAG50:2-FA14:0	0.838592	2.64065e-05	9.28083e-05
	TAG50:4-FA16:1	1.0347	3.03216e-05	0.000106181
	TAG58:7-FA16:0	0.874081	3.2977e-05	0.000115061
	TAG49:3-FA18:3	0.948145	3.38913e-05	0.000117824
	TAG53:5-FA20:4	0.843126	3.44056e-05	0.000119182
	TAG60:11-FA22:6	1.2584	3.47028e-05	0.000119552
	TAG56:4-FA20:3	0.854211	3.47606e-05	0.000119552
	TAG56:2-FA20:0	1.10972	3.87732e-05	0.000132878
	TAG52:6-FA20:4	0.879102	4.06395e-05	0.000138743
	TAG60:10-FA22:6	1.16435	4.08142e-05	0.000138743
	TAG55:2-FA18:1	0.996536	4.09168e-05	0.000138743
	TAG53:4-FA18:0	0.132967	4.15723e-05	0.000140021
	TAG58:7-FA20:4	0.908784	4.15845e-05	0.000140021
	DAG(18:0/18:1)	0.827915	4.18296e-05	0.000140355
	MAG(18:2)	0.744648	4.31305e-05	0.000144218
	TAG54:5-FA16:1	0.883066	4.50344e-05	0.000149916
	TAG54:7-FA22:6	1.13613	4.51461e-05	0.000149916
	TAG54:4-FA20:4	0.88199	4.76958e-05	0.000157528
	TAG56:4-FA22:4	0.958949	4.77656e-05	0.000157528
	TAG52:1-FA18:1	0.854976	4.80126e-05	0.000157802
	TAG52:3-FA16:1	0.900438	5.56083e-05	0.000182145
	TAG52:3-FA14:0	0.893268	5.90154e-05	0.00019265
	TAG54:6-FA22:6	1.08731	6.10953e-05	0.000198766
	TAG52:7-FA18:1	0.776921	6.21705e-05	0.000201583
	TAG52:6-FA20:5	1.09438	6.42477e-05	0.000207287
	TAG56:1-FA18:1	1.04897	6.436e-05	0.000207287
	TAG53:5-FA18:1	0.126699	6.66363e-05	0.000213902
	TAG54:1-FA18:1	0.932061	6.83843e-05	0.000218784
	TAG51:2-FA18:0	0.676106	6.97339e-05	0.000221341
	TAG58:10-FA20:4	1.08698	6.98452e-05	0.000221341
	TAG56:3-FA18:1	1.13421	6.98729e-05	0.000221341
	TAG56:4-FA20:2	0.804156	7.17976e-05	0.000226692
	TAG54:2-FA20:2	0.853563	7.91081e-05	0.000248958
	TAG53:1-FA17:0	0.844923	8.21424e-05	0.000257665
	TAG48:4-FA14:0	0.994464	8.36206e-05	0.00026145
	TAG53:2-FA16:0	0.796308	9.2756e-05	0.000289075
	TAG56:2-FA20:1	1.16898	9.39473e-05	0.000291843
	CE(18:2)	0.246842	9.77074e-05	0.000302547
	TAG53:1-FA18:1	0.822474	9.80267e-05	0.000302563
	TAG52:1-FA16:0	0.839078	0.000106257	0.000325304
	TAG50:3-FA18:0	0.863358	0.000106277	0.000325304
	TAG52:3-FA20:1	0.874388	0.000106408	0.000325304
	TAG56:3-FA20:1	1.14374	0.000111775	0.000340631
	TAG58:6-FA20:4	0.87112	0.000115674	0.0003514
	TAG50:3-FA14:1	0.784684	0.000117176	0.000354846
	TAG48:3-FA18:3	0.939357	0.000123654	0.000373288
	TAG58:10-FA20:5	1.23776	0.000125612	0.000378012
	TAG48:3-FA14:0	0.873316	0.000126161	0.000378483
	TAG52:5-FA20:5	1.04085	0.000130366	0.000389884
	TAG51:2-FA16:0	0.799031	0.000137596	0.00040959
	TAG48:4-FA16:0	0.914556	0.000137806	0.00040959
	DAG(16:0/22:6)	0.793562	0.000158021	0.000468229
	TAG51:2-FA17:0	0.78536	0.000159902	0.000472349
	TAG49:2-FA18:2	0.809591	0.000167757	0.000494036
	DAG(16:0/18:1)	0.752231	0.000173623	0.000509753
	TAG54:4-FA20:3	0.836038	0.000193361	0.000565979
	TAG56:5-FA20:3	0.755101	0.000200283	0.000584462
	TAG58:5-FA18:1	0.899433	0.000203823	0.000592996
	TAG48:3-FA16:0	0.849707	0.000213227	0.000618486
	TAG60:12-FA22:6	1.4624	0.00026461	0.000765223
	TAG56:2-FA18:1	0.982138	0.000265506	0.000765516
	TAG48:4-FA14:1	0.827708	0.000269081	0.000771809
	TAG48:4-FA16:1	0.86918	0.000269292	0.000771809
	TAG54:1-FA20:1	0.921564	0.000291823	0.000831517
	TAG58:9-FA20:4	0.926201	0.000291851	0.000831517
	TAG52:1-FA18:0	0.809968	0.000303676	0.000862654
	TAG54:1-FA18:0	0.918489	0.000332008	0.000940364
	TAG52:4-FA22:4	0.814629	0.000343501	0.000970064
	TAG54:0-FA16:0	0.810539	0.000349865	0.000985146
	DAG(16:1/22:6)	1.0346	0.000353535	0.000992577
	TAG58:6-FA16:0	0.766239	0.000436767	0.00122269
	TAG58:8-FA20:4	0.872377	0.000438277	0.00122294
	TAG52:2-FA16:1	0.789802	0.000439395	0.00122294
	TAG49:2-FA15:0	0.724879	0.00046759	0.00129766
	TAG52:5-FA20:3	0.756853	0.000475232	0.00131508
	TAG54:3-FA16:1	0.827902	0.000522556	0.0014419
	TAG48:3-FA18:2	0.804275	0.000544254	0.00149748
	TAG48:2-FA18:2	0.759815	0.000560287	0.0015372
	TAG51:3-FA16:1	0.794517	0.000566704	0.00155039
	TAG54:1-FA20:0	0.711703	0.000577471	0.00157537
	TAG52:6-FA22:6	0.963897	0.000621332	0.00169023
	TAG51:1-FA15:0	0.722904	0.000626045	0.00169826
	TAG52:7-FA22:6	0.928265	0.000643225	0.00173996
	TAG50:2-FA18:1	0.668019	0.000654803	0.00176632
	TAG54:3-FA20:3	0.769841	0.000661799	0.0017802
	TAG48:4-FA18:3	0.925332	0.000678036	0.0018188
	DAG(18:1/20:2)	0.673956	0.00070729	0.001892
	TAG56:4-FA16:0	0.804054	0.000721707	0.00192522
	TAG49:2-FA16:0	0.69856	0.000727805	0.00193612
	TAG58:2-FA18:1	1.34429	0.00075354	0.00199906
	TAG53:1-FA18:0	0.756745	0.000804151	0.00212747
	DAG(14:0/18:1)	0.637443	0.000814736	0.00214956
	TAG50:2-FA16:0	0.699957	0.000819396	0.00215595
	PC(15:0/20:4)	0.514612	0.000881387	0.00231274
	TAG53:4-FA20:4	0.735895	0.00088409	0.00231353
	TAG54:5-FA22:4	0.807899	0.000933558	0.00243636
	TAG52:3-FA20:2	0.702173	0.00101331	0.00263734
	MAG(18:1)	0.702049	0.00106689	0.00276738
	TAG50:5-FA20:5	0.951894	0.00106902	0.00276738
	PE(18:0/18:0)	0.380279	0.0011688	0.00301756
	TAG52:5-FA20:4	0.792085	0.00117628	0.00302876
	TAG50:2-FA18:0	0.681436	0.00118617	0.00303885
	TAG51:1-FA18:1	0.68897	0.00118651	0.00303885
	TAG50:3-FA16:1	0.791334	0.00128409	0.00328006
	TAG49:3-FA16:1	0.714195	0.00130017	0.00331233
	TAG53:6-FA18:1	0.113455	0.0013064	0.00331944
	DAG(16:0/20:5)	0.905562	0.00136311	0.00345442
	PC(18:0/22:6)	0.512697	0.00148267	0.00374754
	TAG53:3-FA18:0	0.0853026	0.00152744	0.00385059
	TAG54:1-FA16:0	0.809692	0.00155077	0.00389919
	DAG(16:0/20:4)	0.586746	0.00172106	0.0043161
	TAG53:1-FA16:0	0.713234	0.00177243	0.00443337
	DCER(22:0)	0.343048	0.00187214	0.00467064
	LCER(18:1)	-0.159846	0.00190254	0.00473422
	MAG(22:1)	0.293342	0.00197766	0.00490846
	PC(16:0/22:6)	0.406296	0.00201427	0.00498648
	DAG(14:0/22:6)	0.653313	0.00205994	0.00508646
	TAG48:4-FA18:2	0.862405	0.00224018	0.00550509
	TAG51:1-FA17:0	0.674071	0.00224091	0.00550509
	TAG50:6-FA20:4	0.730414	0.00238868	0.00585317
	MAG(20:3)	0.286307	0.00242173	0.0059191
	CE(22:6)	0.491888	0.00244282	0.00595552
	TAG50:1-FA16:0	0.624457	0.00249282	0.00606209
	TAG56:1-FA16:0	0.983978	0.00250085	0.00606629
	TAG51:1-FA16:0	0.663864	0.00257561	0.00623195
	LPC(18:0)	0.304965	0.00285732	0.00689624
	TAG55:8-FA20:4	0.115643	0.00291726	0.00702331
	TAG52:2-FA14:0	0.776573	0.00294039	0.00706133
	TAG49:2-FA18:1	0.631311	0.0029876	0.00715685
	TAG48:2-FA14:0	0.641148	0.0030468	0.00728057
	TAG50:1-FA18:1	0.619853	0.00307453	0.00732864
	CE(20:4)	0.37568	0.00318253	0.00756735
	PE(P-18:2/20:4)	0.589736	0.00334672	0.00793816
	PE(P-16:0/16:1)	-0.164718	0.00341631	0.00808331
	PE(P-18:1/22:6)	0.407763	0.00357023	0.0084268
	SM(22:0)	0.238435	0.00358381	0.00843817
	TAG50:1-FA14:0	0.626817	0.00369768	0.00868504
	PE(P-18:1/16:0)	0.405627	0.00372467	0.00872715
	TAG56:3-FA16:0	0.920953	0.0037552	0.00877733
	TAG48:5-FA18:2	0.942995	0.00383719	0.00894724
	DAG(18:1/20:3)	0.675869	0.00427317	0.00993977
	DCER(22:2)	0.389878	0.00430609	0.00999221
	TAG48:3-FA14:1	0.649592	0.00436563	0.010106
	TAG48:4-FA18:1	0.874622	0.00442034	0.0102081
	DAG(16:1/20:2)	0.488466	0.00457821	0.0105474
	TAG51:1-FA18:0	0.620761	0.00468104	0.0107386
	DAG(15:0/18:1)	0.46355	0.00468351	0.0107386
	TAG52:2-FA20:1	0.704289	0.00478653	0.0109488
	DAG(16:1/18:1)	0.723146	0.00489122	0.0111538
	TAG49:2-FA14:0	0.618881	0.00489933	0.0111538
	DAG(16:0/18:0)	0.527483	0.00498588	0.0113241
	PE(18:0/22:6)	0.548228	0.00502633	0.0113891
	TAG48:5-FA18:3	0.880412	0.00507871	0.0114808
	TAG52:4-FA20:4	0.689473	0.0051924	0.0117103
	TAG50:2-FA14:1	0.610583	0.00523446	0.0117775
	TAG52:1-FA20:1	0.720336	0.00533117	0.0119672
	TAG51:4-FA20:4	0.605287	0.00534903	0.0119793
	TAG54:4-FA22:4	0.712495	0.00550148	0.0122922
	PC(18:0/20:5)	0.618855	0.00580847	0.012948
	TAG58:3-FA18:1	1.31328	0.00583316	0.012973
	TAG48:2-FA16:0	0.627384	0.00594962	0.0132016
	TAG51:2-FA16:1	0.653809	0.00634436	0.0140451
	TAG49:1-FA18:1	0.59324	0.00647359	0.0142983
	TAG48:4-FA12:0	0.899438	0.0065939	0.0145307
	TAG48:3-FA18:1	0.697111	0.00670591	0.0147271
	PE(18:0/18:1)	0.414096	0.00671358	0.0147271
	TAG52:4-FA20:3	0.6778	0.00684652	0.0149845
	CE(22:0)	0.302356	0.00704257	0.0153787
	DAG(14:0/20:4)	0.564054	0.00721124	0.0157114
	PC(14:0/20:3)	0.438875	0.00727721	0.0158193
	DCER(20:0)	0.230661	0.00750149	0.0162325
	TAG52:0-FA16:0	0.646072	0.00750372	0.0162325
	MAG(20:4)	0.30319	0.00751785	0.0162325
	TAG52:2-FA20:2	0.636257	0.00758937	0.0163503
	LPC(22:6)	0.422621	0.00763259	0.0164067
	TAG52:1-FA16:1	0.618419	0.00767914	0.01647
	TAG49:1-FA15:0	0.57712	0.00770341	0.0164853
	PC(20:0/16:1)	-0.576129	0.00778945	0.0166325
	TAG58:8-FA20:3	0.650288	0.00784032	0.0167041
	TAG50:5-FA20:4	0.665306	0.00825682	0.0175526
	DAG(12:0/18:2)	0.542945	0.00866025	0.0183696
	TAG56:2-FA16:0	0.99876	0.00887474	0.0187833
	TAG48:3-FA12:0	0.774706	0.00896721	0.0189373
	DAG(14:1/16:0)	0.434422	0.00918637	0.0193577
	TAG50:2-FA16:1	0.667233	0.00946169	0.0198943
	TAG54:0-FA18:0	0.719913	0.00996376	0.0209044
	DAG(16:1/20:4)	0.721345	0.0100691	0.0210794
	DAG(14:1/18:1)	0.546603	0.0106181	0.0221805
	TAG49:2-FA17:0	0.573155	0.0106777	0.0222568
	CE(20:5)	0.521512	0.0108093	0.0224824
	MAG(18:3)	0.217614	0.011142	0.0231244
	TAG49:1-FA16:0	0.565923	0.01137	0.023547
	PC(14:0/22:6)	0.35447	0.0115249	0.0238164
	TAG48:3-FA16:1	0.641117	0.01166	0.0240442
	PE(P-18:0/22:6)	0.325613	0.012477	0.0256738
	TAG52:0-FA18:0	0.636647	0.0132649	0.0272369
	CE(18:3)	0.375815	0.0138263	0.0283293
	PC(17:0/18:3)	0.120955	0.0139156	0.0284517
	DCER(24:0)	0.308864	0.0143048	0.0291854
	TAG48:1-FA18:1	0.536569	0.0146592	0.0298452
	PC(17:0/20:5)	0.680463	0.0158565	0.0322147
	PC(16:0/20:5)	0.515593	0.0164505	0.0333511
	TAG50:1-FA18:0	0.542739	0.0169699	0.0343319
	PC(18:0/20:4)	0.387745	0.0171669	0.0346577
	DCER(16:0)	0.210039	0.017675	0.0356089
	CE(18:4)	0.508701	0.0180411	0.036252
	TAG48:2-FA18:1	0.541616	0.0180695	0.036252
	PE(P-16:0/20:4)	0.326177	0.0183867	0.0368117
	PC(18:2/22:6)	0.320984	0.0193026	0.0385652
	PC(14:0/18:2)	0.289159	0.0194186	0.0387165
	PE(P-18:1/20:4)	0.33849	0.0194677	0.0387343
	PE(P-16:0/22:6)	0.310436	0.0203746	0.0404552
	TAG50:4-FA20:4	0.604668	0.0210071	0.0416252
	PC(17:0/20:4)	0.415854	0.0212467	0.0420136
	PE(P-18:1/16:1)	-0.113454	0.0213865	0.0422032
	PI(16:0/16:1)	-0.136552	0.0215651	0.0424686
	LCER(24:1)	-0.266978	0.0216476	0.0425233
	PC(16:0/18:3)	0.351142	0.0216811	0.0425233
	TAG49:2-FA16:1	0.567136	0.0223641	0.0437736
	TAG50:1-FA16:1	0.607564	0.0226043	0.0441112
	TAG47:2-FA18:2	0.546971	0.0226282	0.0441112
	DAG(16:0/20:3)	0.392615	0.0230033	0.0447519
	TAG55:7-FA20:3	0.0666632	0.0238558	0.0463167
	PE(18:0/18:2)	0.343185	0.0239399	0.0463865
	DAG(16:0/16:0)	0.505676	0.0246323	0.0476324
	PC(17:0/18:2)	0.254086	0.0248978	0.0480492
	DAG(16:1/18:0)	0.394019	0.0250925	0.0483282
	PI(18:1/16:1)	-0.162604	0.0252662	0.0485655
	TAG52:3-FA20:3	0.569078	0.0259177	0.0497185
SNF-3-SNF-1	TAG42:1-FA16:0	-3.34544	6.89866e-17	4.87666e-14
	TAG44:1-FA16:0	-2.96711	2.17726e-16	4.87666e-14
	TAG46:1-FA18:0	-2.98191	3.75837e-16	4.87666e-14
	TAG45:0-FA16:0	-2.81642	3.91645e-16	4.87666e-14
	TAG45:0-FA15:0	-3.26043	4.50323e-16	4.87666e-14
	TAG45:0-FA14:0	-3.32118	4.51492e-16	4.87666e-14
	TAG45:1-FA15:0	-2.84362	5.53779e-16	4.87666e-14
	TAG44:1-FA14:1	-3.21161	5.5908e-16	4.87666e-14
	TAG47:0-FA15:0	-2.68788	5.84075e-16	4.87666e-14
	TAG46:0-FA16:0	-2.96048	5.85245e-16	4.87666e-14
	TAG42:1-FA14:0	-3.63357	6.5472e-16	4.87666e-14
	TAG44:2-FA18:1	-2.88289	6.65815e-16	4.87666e-14
	TAG46:0-FA14:0	-2.94776	6.97032e-16	4.87666e-14
	TAG47:0-FA14:0	-2.92081	7.08964e-16	4.87666e-14
	TAG47:0-FA16:0	-2.66738	1.29777e-15	8.33169e-14
	TAG45:1-FA18:1	-2.50655	1.71521e-15	1.03234e-13
	TAG42:1-FA16:1	-2.98546	1.91878e-15	1.08693e-13
	TAG48:0-FA18:0	-2.66072	2.09504e-15	1.12085e-13
	TAG47:1-FA17:0	-2.40366	2.22632e-15	1.12839e-13
	TAG47:0-FA17:0	-2.51307	2.47302e-15	1.19076e-13
	TAG44:0-FA14:0	-3.44886	3.00335e-15	1.37725e-13
	TAG48:0-FA14:0	-2.38757	3.46734e-15	1.51775e-13
	TAG42:0-FA16:0	-3.63666	3.64615e-15	1.52663e-13
	TAG44:0-FA16:0	-3.44856	4.068e-15	1.63229e-13
	TAG49:0-FA18:0	-2.43679	7.12386e-15	2.74411e-13
	TAG46:0-FA18:0	-3.20238	1.05936e-14	3.67659e-13
	TAG45:1-FA16:0	-2.08702	1.06852e-14	3.67659e-13
	TAG44:1-FA18:1	-2.98535	1.069e-14	3.67659e-13
	TAG46:2-FA18:1	-2.41292	1.12768e-14	3.72726e-13
	TAG46:1-FA14:1	-2.74168	1.16114e-14	3.72726e-13
	TAG44:1-FA14:0	-3.17851	1.48354e-14	4.60855e-13
	TAG44:2-FA16:0	-2.65476	2.23479e-14	6.72532e-13
	TAG44:2-FA16:1	-2.72017	2.68104e-14	7.78571e-13
	TAG48:1-FA18:0	-2.42822	2.74885e-14	7.78571e-13
	TAG47:1-FA18:1	-2.14742	3.14317e-14	8.6482e-13
	TAG46:1-FA14:0	-2.43655	3.6984e-14	9.89323e-13
	TAG46:1-FA16:0	-2.56824	3.93195e-14	1.02337e-12
	TAG49:0-FA17:0	-2.30495	4.07426e-14	1.0325e-12
	TAG44:1-FA16:1	-2.89527	5.60159e-14	1.38316e-12
	TAG47:1-FA14:0	-2.27528	6.35081e-14	1.52896e-12
	TAG49:0-FA16:0	-2.22268	8.11076e-14	1.82025e-12
	TAG40:0-FA16:0	-3.91068	8.13104e-14	1.82025e-12
	TAG44:0-FA12:0	-3.43266	8.31659e-14	1.82025e-12
	TAG44:1-FA12:0	-3.19139	8.31681e-14	1.82025e-12
	TAG49:0-FA15:0	-2.10465	8.72428e-14	1.85955e-12
	TAG47:1-FA15:0	-2.23171	8.88258e-14	1.85955e-12
	TAG46:2-FA14:1	-2.49804	1.0527e-13	2.15692e-12
	TAG49:1-FA14:0	-2.06945	1.16873e-13	2.34476e-12
	TAG42:0-FA14:0	-3.83494	1.25351e-13	2.46353e-12
	TAG46:1-FA18:1	-2.49625	1.50269e-13	2.89419e-12
	TAG50:0-FA14:0	-2.18855	1.5519e-13	2.93035e-12
	TAG46:0-FA12:0	-3.02355	1.6589e-13	3.07216e-12
	TAG42:1-FA18:1	-3.52523	3.23433e-13	5.87672e-12
	TAG47:1-FA16:0	-2.16928	3.4993e-13	6.24042e-12
	TAG48:1-FA14:1	-2.24444	3.97435e-13	6.95873e-12
	TAG51:0-FA18:0	-2.15823	4.67006e-13	8.03084e-12
	TAG47:2-FA18:1	-1.7272	7.64648e-13	1.29185e-11
	TAG48:1-FA18:1	-1.81939	9.0424e-13	1.50135e-11
	TAG46:1-FA12:0	-2.58142	1.03316e-12	1.67175e-11
	TAG40:0-FA14:0	-3.62703	1.04159e-12	1.67175e-11
	TAG44:3-FA18:2	-2.50479	1.15582e-12	1.82468e-11
	TAG46:2-FA14:0	-2.12363	1.39385e-12	2.16497e-11
	TAG48:0-FA16:0	-2.25451	1.47378e-12	2.25278e-11
	TAG48:1-FA14:0	-1.84855	1.90634e-12	2.86845e-11
	TAG46:3-FA14:1	-2.07758	2.17568e-12	3.22336e-11
	TAG49:1-FA17:0	-1.94672	3.02859e-12	4.41898e-11
	TAG44:2-FA18:2	-2.68701	3.1698e-12	4.50417e-11
	TAG42:0-FA12:0	-3.8244	3.18052e-12	4.50417e-11
	TAG44:2-FA12:0	-2.86721	3.39989e-12	4.74507e-11
	TAG51:0-FA16:0	-1.86153	4.22466e-12	5.81192e-11
	TAG52:0-FA20:0	-1.85941	4.90069e-12	6.64699e-11
	TAG46:2-FA16:0	-2.23036	5.04117e-12	6.74256e-11
	TAG44:2-FA14:0	-2.78014	5.81554e-12	7.67173e-11
	TAG52:7-FA16:0	-1.85406	7.38487e-12	9.61031e-11
	TAG46:3-FA18:1	-2.22782	1.16669e-11	1.47586e-10
	TAG50:0-FA18:0	-2.01807	1.17188e-11	1.47586e-10
	TAG52:1-FA20:0	-1.56098	1.18007e-11	1.47586e-10
	TAG46:1-FA16:1	-2.38972	1.22019e-11	1.49027e-10
	TAG48:1-FA12:0	-2.37681	1.22255e-11	1.49027e-10
	TAG48:1-FA16:0	-1.83749	1.51368e-11	1.82209e-10
	DAG(14:0/16:0)	-1.68201	2.05148e-11	2.43898e-10
	TAG50:1-FA18:0	-1.72756	2.38057e-11	2.79572e-10
	TAG50:2-FA14:1	-1.6472	2.6525e-11	3.07754e-10
	TAG51:0-FA17:0	-1.825	2.94125e-11	3.37194e-10
	TAG47:2-FA14:0	-1.82443	3.10839e-11	3.52163e-10
	TAG47:2-FA15:0	-1.7828	4.08876e-11	4.57846e-10
	TAG48:2-FA18:1	-1.70326	5.24308e-11	5.80355e-10
	TAG48:2-FA18:0	-2.11252	6.01048e-11	6.57738e-10
	TAG46:3-FA18:2	-2.02535	6.38448e-11	6.90815e-10
	TAG48:4-FA20:4	-2.10177	7.41196e-11	7.9308e-10
	TAG46:3-FA16:0	-2.16093	7.5013e-11	7.93819e-10
	TAG42:2-FA18:2	-2.90411	7.63117e-11	7.98785e-10
	TAG46:2-FA12:0	-2.15502	8.02963e-11	8.31455e-10
	TAG46:2-FA16:1	-2.1185	1.01209e-10	1e-09
	TAG46:3-FA14:0	-2.05649	1.06357e-10	1.07813e-09
	TAG50:1-FA14:0	-1.55677	1.16293e-10	1.16656e-09
	TAG49:1-FA15:0	-1.56558	1.20212e-10	1.19344e-09
	TAG48:2-FA14:1	-1.79847	1.29752e-10	1.27501e-09
	TAG46:2-FA18:2	-2.09658	1.35165e-10	1.31478e-09
	TAG51:1-FA18:0	-1.57612	1.38739e-10	1.33606e-09
	TAG49:1-FA18:1	-1.56328	1.50668e-10	1.43657e-09
	TAG49:1-FA16:0	-1.60199	1.73404e-10	1.63714e-09
	TAG49:2-FA17:0	-1.59337	2.3563e-10	2.20303e-09
	TAG46:3-FA18:3	-2.3675	2.82803e-10	2.59493e-09
	DAG(12:0/16:0)	-1.71311	2.82936e-10	2.59493e-09
	TAG42:1-FA12:0	-3.75178	2.94751e-10	2.67779e-09
	TAG47:1-FA16:1	-1.68195	3.08309e-10	2.77478e-09
	TAG40:0-FA12:0	-3.99242	3.26683e-10	2.91292e-09
	TAG46:3-FA16:1	-1.8068	7.62924e-10	6.74033e-09
	TAG50:2-FA18:0	-1.42192	7.83813e-10	6.86193e-09
	TAG47:2-FA18:2	-1.64382	8.3607e-10	7.25347e-09
	TAG49:2-FA14:0	-1.49329	8.81148e-10	7.5763e-09
	TAG50:2-FA20:2	-1.66947	1.11001e-09	9.45966e-09
	TAG50:0-FA16:0	-1.66135	1.38887e-09	1.17323e-08
	TAG48:2-FA16:0	-1.51126	1.93673e-09	1.6218e-08
	TAG46:3-FA12:0	-1.98344	2.79731e-09	2.32225e-08
	TAG50:1-FA20:1	-1.85077	4.60802e-09	3.79276e-08
	TAG48:3-FA16:0	-1.44287	5.57411e-09	4.54904e-08
	TAG49:1-FA16:1	-1.69748	5.93717e-09	4.8e-08
	TAG51:1-FA16:0	-1.3907	7.1434e-09	5.73258e-08
	TAG48:2-FA14:0	-1.3655	7.4585e-09	5.93598e-08
	TAG50:3-FA20:3	-1.65915	9.32434e-09	7.36011e-08
	TAG48:3-FA18:3	-1.49302	1.21678e-08	9.52649e-08
	TAG53:1-FA16:0	-1.40617	1.35166e-08	1.05e-07
	TAG52:0-FA16:0	-1.49817	1.4e-08	1.07856e-07
	TAG48:2-FA12:0	-1.73387	1.57097e-08	1.20067e-07
	TAG48:3-FA14:1	-1.3996	1.68967e-08	1.28122e-07
	TAG48:2-FA18:2	-1.3273	2.12905e-08	1.60178e-07
	TAG38:0-FA12:0	-3.17922	2.33219e-08	1.741e-07
	TAG50:4-FA20:4	-1.6	2.43859e-08	1.79595e-07
	TAG50:3-FA18:0	-1.32426	2.44309e-08	1.79595e-07
	TAG52:7-FA18:1	-1.14969	2.46922e-08	1.80141e-07
	TAG47:2-FA16:1	-1.73667	2.55422e-08	1.84941e-07
	DAG(14:0/14:0)	-1.11431	2.77846e-08	1.99676e-07
	TAG42:2-FA12:0	-3.24056	2.96534e-08	2.11528e-07
	TAG51:1-FA18:1	-1.26726	3.15106e-08	2.23123e-07
	TAG52:0-FA18:0	-1.54926	3.28106e-08	2.30632e-07
	TAG51:1-FA17:0	-1.31705	3.31147e-08	2.31083e-07
	DAG(12:0/18:1)	-1.45458	3.52958e-08	2.44531e-07
	TAG51:1-FA15:0	-1.24264	4.22128e-08	2.90364e-07
	TAG48:1-FA16:1	-1.79509	5.45391e-08	3.72491e-07
	TAG50:5-FA20:4	-1.48391	5.62198e-08	3.81265e-07
	DAG(15:0/18:1)	-0.961567	5.83807e-08	3.93151e-07
	TAG53:1-FA18:0	-1.29949	7.6e-08	5.08431e-07
	TAG46:4-FA18:2	-1.84434	7.9563e-08	5.28408e-07
	TAG49:2-FA18:1	-1.22237	9.26548e-08	6.11141e-07
	DAG(16:0/16:0)	-1.30589	9.48837e-08	6.21585e-07
	TAG48:4-FA16:0	-1.34681	1.13074e-07	7.35744e-07
	TAG49:2-FA16:0	-1.16753	1.21e-07	7.82068e-07
	TAG48:3-FA18:1	-1.44683	1.74634e-07	1.12115e-06
	TAG50:4-FA20:3	-1.43512	1.85e-07	1.17979e-06
	TAG44:0-FA18:0	-1.01913	2.26169e-07	1.4329e-06
	TAG51:4-FA20:4	-1.20805	2.282e-07	1.43632e-06
	DAG(16:0/18:0)	-1.04356	2.29876e-07	1.43747e-06
	TAG48:4-FA14:1	-1.23616	2.64135e-07	1.641e-06
	TAG48:4-FA18:3	-1.48326	2.88309e-07	1.77975e-06
	DAG(14:0/20:0)	-0.777356	3.12512e-07	1.91687e-06
	TAG52:8-FA16:1	-1.36263	3.92831e-07	2.39428e-06
	TAG50:1-FA18:1	-1.13382	3.97763e-07	2.40909e-06
	TAG54:0-FA18:0	-1.51474	4.40783e-07	2.653e-06
	TAG36:0-FA12:0	-3.4339	4.83217e-07	2.89029e-06
	DAG(14:0/18:1)	-1.0139	5.00724e-07	2.97652e-06
	TAG49:3-FA18:3	-1.19333	5.44776e-07	3.21852e-06
	TAG54:0-FA16:0	-1.1876	6.57341e-07	3.85988e-06
	TAG48:4-FA18:1	-1.62874	6.74101e-07	3.9343e-06
	TAG50:1-FA16:0	-1.07502	9.43325e-07	5.47242e-06
	TAG48:3-FA18:2	-1.19435	1.07534e-06	6.20089e-06
	DAG(14:1/16:0)	-0.866896	1.12374e-06	6.44144e-06
	TAG49:3-FA16:0	-1.05294	1.25207e-06	7.1346e-06
	TAG49:2-FA15:0	-1.03937	1.74352e-06	9.87652e-06
	TAG50:3-FA14:1	-1.01295	1.80351e-06	1.01566e-05
	PE(16:0/18:1)	-0.84992	2.04011e-06	1.14223e-05
	TAG52:1-FA20:1	-1.29324	2.39373e-06	1.33246e-05
	TAG51:2-FA18:0	-0.825413	2.789e-06	1.54355e-05
	TAG52:1-FA16:1	-1.15206	2.88e-06	1.58485e-05
	TAG48:3-FA14:0	-1.09673	3.52316e-06	1.92773e-05
	PC(16:0/14:0)	-0.874328	3.73929e-06	2.03443e-05
	TAG54:1-FA20:0	-0.992635	4.36768e-06	2.36296e-05
	DAG(14:0/16:1)	-1.0029	4.47424e-06	2.40709e-05
	TAG48:2-FA16:1	-1.41225	4.52736e-06	2.42214e-05
	TAG52:4-FA22:4	-1.08099	5.08574e-06	2.70584e-05
	TAG49:2-FA18:2	-1.00668	6.33417e-06	3.35154e-05
	TAG53:1-FA18:1	-0.983976	6.48629e-06	3.41328e-05
	TAG53:2-FA16:0	-0.946637	6.82013e-06	3.56945e-05
	TAG52:2-FA20:2	-1.13206	6.88941e-06	3.58622e-05
	TAG50:2-FA14:0	-0.917927	7.28006e-06	3.76919e-05
	TAG52:1-FA18:0	-1.03713	8.36728e-06	4.30893e-05
	TAG49:2-FA16:1	-1.17255	8.495e-06	4.33211e-05
	TAG50:6-FA20:4	-1.12323	8.50227e-06	4.33211e-05
	PI(16:0/18:1)	-0.861737	9.11449e-06	4.61961e-05
	TAG54:1-FA16:0	-1.1849	9.52933e-06	4.80458e-05
	PC(20:0/16:1)	-1.00909	9.85418e-06	4.94249e-05
	DAG(12:0/18:2)	-0.945229	1.42046e-05	7.0876e-05
	TAG53:1-FA17:0	-0.952807	1.54846e-05	7.68645e-05
	TAG50:1-FA16:1	-1.21262	1.66443e-05	8.21974e-05
	TAG48:3-FA12:0	-1.33468	1.85661e-05	9.12203e-05
	TAG48:4-FA16:1	-1.04018	2.37666e-05	0.000116179
	DAG(14:0/20:4)	-0.92634	2.57448e-05	0.000124921
	TAG48:4-FA14:0	-1.09014	2.58144e-05	0.000124921
	PC(18:0/16:1)	-0.968245	2.66272e-05	0.00012821
	TAG53:4-FA20:4	-0.958685	2.94303e-05	0.000141002
	DAG(16:1/20:0)	-0.715539	2.98289e-05	0.000142204
	TAG52:3-FA20:3	-1.12073	3.15489e-05	0.000149663
	TAG50:2-FA18:1	-0.843546	3.20056e-05	0.000151085
	TAG48:5-FA18:3	-1.36324	3.31969e-05	0.000155944
	PC(16:0/16:1)	-0.98501	3.63374e-05	0.000169869
	TAG52:4-FA20:4	-1.06	3.89873e-05	0.000180636
	PE(16:0/18:2)	-0.730201	3.90158e-05	0.000180636
	PE(18:0/18:1)	-0.653906	4.23282e-05	0.000195034
	TAG52:2-FA14:0	-1.11063	4.39266e-05	0.000201435
	TAG48:3-FA16:1	-1.08394	4.69832e-05	0.00021443
	TAG52:2-FA20:1	-1.05243	5.26204e-05	0.000239026
	TAG54:1-FA18:0	-1.05327	6.19244e-05	0.000279968
	TAG51:3-FA18:3	-0.87957	6.2991e-05	0.00028346
	TAG51:2-FA16:1	-0.996412	6.62556e-05	0.000296763
	TAG51:2-FA17:0	-0.847866	6.7895e-05	0.000302699
	DAG(12:0/18:0)	-0.704416	8.01909e-05	0.00035587
	TAG52:2-FA20:0	-0.715571	8.53593e-05	0.000377069
	CE(14:1)	-0.923744	9.13897e-05	0.000401864
	TAG48:4-FA12:0	-1.33002	0.000112142	0.000490876
	TAG54:4-FA22:4	-1.02306	0.000123892	0.000539856
	PI(18:0/16:1)	-0.768756	0.000125674	0.000545153
	DAG(18:2/22:5)	0.759681	0.000131984	0.000569958
	TAG51:2-FA16:0	-0.811913	0.000142281	0.000611683
	PE(16:0/20:3)	-0.703715	0.000160616	0.000687435
	PE(18:0/18:2)	-0.598676	0.000162385	0.000691932
	DAG(16:0/16:1)	-1.00554	0.000165886	0.000703737
	PC(14:0/18:1)	-0.552593	0.000180199	0.000761104
	TAG53:2-FA18:0	-0.627414	0.00018882	0.000794035
	TAG54:1-FA18:1	-0.883825	0.00019342	0.000809842
	TAG48:5-FA18:2	-1.24902	0.000211812	0.000883007
	TAG56:1-FA16:0	-1.24019	0.000220136	0.000913756
	TAG52:1-FA16:0	-0.810799	0.000222975	0.000921568
	TAG52:4-FA14:0	-0.808463	0.000238277	0.000980603
	TAG49:3-FA15:0	-0.775094	0.000242446	0.000993512
	TAG50:3-FA18:3	-0.823255	0.000245349	0.00100115
	TAG51:2-FA18:2	-0.73376	0.000247957	0.00100752
	PE(18:1/18:2)	-0.745735	0.000276653	0.0011194
	PE(O-18:0/18:1)	-0.507249	0.000293713	0.00118346
	PE(18:1/18:1)	-0.812631	0.000318678	0.0012787
	TAG52:3-FA20:2	-0.787537	0.000320746	0.00128165
	TAG52:3-FA14:0	-0.806478	0.000327288	0.00130239
	TAG56:8-FA18:2	0.818169	0.000328914	0.00130347
	DAG(18:2/22:6)	1.04858	0.000390498	0.00154119
	TAG48:4-FA18:2	-1.02755	0.000394439	0.00155039
	DAG(14:0/18:2)	-0.62869	0.000440109	0.00172287
	PI(16:0/18:2)	-0.707388	0.000453285	0.00176726
	TAG50:2-FA16:0	-0.747635	0.000467081	0.00181371
	TAG50:5-FA20:5	-1.03569	0.000498955	0.00192969
	TAG52:5-FA20:4	-0.868818	0.00050334	0.00193886
	DAG(14:1/18:1)	-0.766989	0.0005262	0.00201885
	TAG51:2-FA18:1	-0.699861	0.000566268	0.00216395
	TAG52:8-FA18:2	-0.656641	0.000604492	0.00230089
	TAG55:2-FA18:1	-0.835246	0.000616808	0.00233055
	TAG56:7-FA18:2	0.640952	0.000617125	0.00233055
	TAG49:3-FA18:2	-0.686057	0.000630232	0.00237011
	PC(16:0/18:1)	-0.393028	0.000632521	0.00237011
	PE(P-18:0/20:3)	-0.524873	0.00065004	0.00242631
	TAG54:1-FA20:1	-0.870153	0.000739749	0.0027505
	PE(O-18:0/18:2)	-0.486182	0.000751785	0.0027845
	DAG(18:2/18:3)	0.822985	0.000770217	0.00284184
	TAG52:4-FA20:3	-0.858167	0.000878082	0.00322745
	TAG52:5-FA14:0	-0.720539	0.00089054	0.0032608
	PC(18:1/18:1)	-0.367492	0.000956311	0.00348836
	CE(16:1)	-0.672978	0.000983475	0.00357391
	TAG58:8-FA18:2	0.67178	0.00109335	0.00395826
	TAG58:10-FA18:2	0.902361	0.00112762	0.00406702
	PC(14:0/16:1)	-0.697257	0.0011592	0.00416532
	DAG(15:0/18:2)	-0.435205	0.00118681	0.00424869
	TAG53:4-FA16:0	-0.614075	0.00126193	0.00450088
	PC(16:0/12:0)	-0.736163	0.00130673	0.00464348
	TAG52:6-FA22:6	-0.917854	0.00131902	0.00466991
	TAG49:3-FA16:1	-0.725798	0.00133118	0.00469571
	TAG50:3-FA18:1	-0.608458	0.00139603	0.00488666
	TAG52:1-FA18:1	-0.672447	0.00139949	0.00488666
	DAG(16:1/18:0)	-0.580564	0.00140054	0.00488666
	TAG50:2-FA16:1	-0.844178	0.00140911	0.00489881
	PC(18:0/14:0)	-0.536391	0.00143985	0.0049877
	TAG58:8-FA22:5	0.623915	0.00152832	0.00527518
	TAG54:5-FA22:4	-0.780772	0.00163522	0.005624
	CER(16:0)	-0.286678	0.00164675	0.00564349
	TAG56:1-FA18:1	-0.824374	0.00170994	0.00583927
	PE(P-16:0/18:1)	-0.374236	0.00178687	0.0060804
	PE(18:1/20:4)	-0.494218	0.00190713	0.00646678
	DAG(18:2/20:5)	0.917039	0.00197499	0.00667339
	PC(14:0/14:0)	-0.773417	0.00205054	0.00690445
	LPE(18:1)	-0.489546	0.0021205	0.00711514
	TAG58:9-FA22:5	0.650825	0.00218392	0.00730248
	TAG56:8-FA22:5	0.625235	0.00219932	0.00732852
	TAG53:3-FA16:0	-0.603077	0.00221626	0.0073595
	TAG52:7-FA22:6	-0.840994	0.00224958	0.00744449
	CE(14:0)	-0.529948	0.00231153	0.0076233
	TAG57:3-FA18:2	0.82143	0.00233563	0.00767649
	TAG52:5-FA22:5	-0.597086	0.00236398	0.00774324
	DAG(16:0/18:1)	-0.611811	0.00237446	0.00775122
	PE(16:0/16:1)	-0.399361	0.00252427	0.00821242
	TAG58:10-FA22:5	0.741728	0.0025605	0.00829951
	PE(P-16:0/20:3)	-0.459195	0.00256828	0.00829951
	LPE(16:1)	-0.582669	0.0025947	0.00835684
	PC(18:1/16:1)	-0.425319	0.00262152	0.00841508
	PE(18:1/20:3)	-0.644959	0.0027009	0.00864108
	LCER(18:1)	-0.156662	0.00275807	0.00879479
	PC(18:0/18:1)	-0.379889	0.00299355	0.00951417
	CER(14:0)	-0.265866	0.00302492	0.00958224
	TAG50:4-FA18:1	-0.665032	0.003053	0.0096146
	LCER(18:0)	-0.213003	0.00305511	0.0096146
	TAG53:5-FA20:4	-0.599304	0.00308595	0.00964909
	TAG54:2-FA20:0	-0.549928	0.00308611	0.00964909
	TAG58:9-FA18:2	0.771526	0.00315894	0.00984486
	TAG52:6-FA20:4	-0.624496	0.00340359	0.0105731
	TAG52:4-FA18:2	0.570022	0.00350594	0.010856
	TAG54:7-FA18:2	0.901839	0.00356118	0.0109917
	PE(P-18:0/18:1)	-0.377104	0.00360327	0.0110861
	TAG52:2-FA18:0	-0.606716	0.0036185	0.0110975
	TAG52:5-FA18:2	0.654186	0.00390077	0.0119098
	PI(18:0/18:1)	-0.523782	0.00390811	0.0119098
	PE(P-16:0/16:1)	-0.164419	0.00408281	0.012403
	TAG56:7-FA22:5	0.514092	0.00425941	0.0128988
	PE(16:0/20:4)	-0.531739	0.00430698	0.013002
	TAG50:2-FA18:2	-0.605948	0.00434359	0.0130715
	PI(18:0/22:5)	-0.375956	0.00440035	0.0132011
	TAG54:5-FA18:2	0.742711	0.00455425	0.0136202
	TAG56:8-FA20:5	0.762886	0.00456835	0.0136202
	TAG58:9-FA22:6	0.830378	0.004874	0.0144866
	TAG52:5-FA20:3	-0.612504	0.00495713	0.0146884
	TAG54:6-FA18:2	0.823279	0.00500052	0.0147715
	TAG51:3-FA17:0	-0.55495	0.00517367	0.0152362
	TAG50:5-FA18:1	-0.652933	0.00520885	0.015293
	TAG50:4-FA14:1	-0.551531	0.00526172	0.015385
	TAG56:8-FA16:0	0.639379	0.0052853	0.015385
	LPC(16:1)	-0.49317	0.0052881	0.015385
	TAG58:10-FA22:6	0.882198	0.00542342	0.0157312
	TAG55:2-FA18:2	0.646696	0.00575029	0.0166292
	TAG54:5-FA22:5	-0.569955	0.00590622	0.017029
	PE(18:0/20:3)	-0.500748	0.00603385	0.0173451
	TAG56:9-FA18:3	0.73295	0.00608329	0.0174351
	DAG(16:1/16:1)	-0.587265	0.00624533	0.0178465
	TAG54:2-FA20:2	-0.584601	0.0066225	0.0188683
	TAG56:9-FA22:6	0.802252	0.00666004	0.0189192
	TAG54:3-FA20:3	-0.613944	0.00697555	0.0197572
	TAG51:2-FA15:0	-0.538332	0.0074552	0.0210538
	TAG56:8-FA22:6	0.703492	0.00781239	0.0219981
	TAG55:7-FA18:1	-0.335728	0.00808227	0.0226916
	LCER(20:0)	-0.24943	0.00812653	0.0227496
	TAG50:4-FA18:3	-0.563303	0.0081628	0.0227849
	TAG52:2-FA16:1	-0.596053	0.00820347	0.0228322
	TAG52:5-FA16:1	0.557157	0.00826405	0.0229345
	PE(P-18:0/18:2)	-0.393917	0.00829439	0.0229526
	PE(18:1/22:5)	-0.563726	0.00853484	0.0235503
	TAG56:6-FA18:2	0.514592	0.00873033	0.0240209
	TAG55:1-FA16:0	0.594099	0.00902017	0.0247476
	TAG55:3-FA18:1	-0.594993	0.00919325	0.0251509
	PE(O-16:0/18:1)	-0.448358	0.00926428	0.0252734
	PE(18:1/22:4)	-0.234955	0.00931827	0.0252813
	DAG(18:1/18:2)	0.503996	0.00931969	0.0252813
	PC(17:0/18:1)	-0.287068	0.0094306	0.0255103
	PI(16:0/16:1)	-0.157128	0.00970559	0.0261806
	PE(O-16:0/20:3)	-0.483119	0.00994895	0.0267621
	DAG(18:0/18:1)	-0.514511	0.0101285	0.0271691
	TAG58:7-FA18:2	0.467129	0.0103503	0.0276871
	PE(18:0/18:3)	-0.490643	0.0106348	0.0283692
	DAG(16:0/20:3)	-0.449827	0.0108331	0.0288183
	TAG50:5-FA16:0	-0.617478	0.0108676	0.0288306
	TAG56:9-FA20:5	0.752297	0.011136	0.0294615
	TAG52:6-FA18:2	0.595096	0.011927	0.0314678
	TAG52:6-FA14:0	-0.600756	0.0120839	0.0317944
	LPE(16:0)	-0.294688	0.0121745	0.0319455
	PE(P-18:1/16:1)	-0.12586	0.012427	0.0325197
	PI(18:1/16:1)	-0.184977	0.0127498	0.0332738
	PE(18:1/16:1)	-0.494783	0.013908	0.0361983
	TAG51:3-FA16:1	-0.566496	0.0141873	0.0368258
	PC(16:0/18:3)	-0.381935	0.0144034	0.0372431
	TAG52:3-FA20:1	-0.54832	0.0144254	0.0372431
	PE(16:0/22:4)	-0.574557	0.0144909	0.0372814
	PC(17:0/16:1)	-0.399475	0.0145177	0.0372814
	PC(18:0/18:3)	-0.417659	0.0147231	0.0377083
	TAG50:5-FA14:1	-0.50107	0.0152139	0.0388202
	HCER(20:1)	-0.256755	0.0152378	0.0388202
	TAG54:6-FA18:3	0.751804	0.0154938	0.0393682
	PE(16:0/22:5)	-0.552123	0.0158519	0.040172
	TAG53:2-FA18:1	-0.486424	0.0163601	0.041351
	TAG56:8-FA18:3	0.537128	0.0169138	0.0426387
	PE(P-18:0/16:1)	-0.367312	0.0181331	0.0455931
	PI(18:1/18:1)	-0.501372	0.019208	0.0481702
	TAG54:4-FA20:4	-0.499367	0.0197439	0.0493854
	DAG(18:1/22:6)	0.628334	0.0200371	0.049989
SNF-3-SNF-2	TAG48:1-FA18:1	-2.35596	2.278e-22	1.29915e-19
	TAG44:2-FA18:1	-3.15572	2.69813e-22	1.29915e-19
	TAG47:1-FA17:0	-2.67372	4.80587e-22	1.30492e-19
	TAG46:2-FA18:1	-2.77564	5.45336e-22	1.30492e-19
	TAG48:0-FA14:0	-2.66002	7.72763e-22	1.30492e-19
	TAG46:1-FA18:0	-3.16572	8.13285e-22	1.30492e-19
	TAG49:1-FA14:0	-2.48883	9.48536e-22	1.30492e-19
	TAG47:1-FA18:1	-2.48626	1.46201e-21	1.6303e-19
	TAG50:2-FA14:1	-2.25778	1.52364e-21	1.6303e-19
	TAG47:2-FA18:1	-2.14698	1.98465e-21	1.87232e-19
	TAG48:1-FA18:0	-2.78265	2.22373e-21	1.87232e-19
	TAG48:1-FA14:0	-2.34186	2.51698e-21	1.87232e-19
	TAG49:0-FA18:0	-2.69985	2.69626e-21	1.87232e-19
	TAG44:1-FA16:0	-3.05082	2.72195e-21	1.87232e-19
	TAG49:0-FA15:0	-2.45795	3.50724e-21	2.21627e-19
	TAG52:7-FA18:1	-1.92661	3.88926e-21	2.21627e-19
	TAG48:3-FA16:0	-2.29257	3.98643e-21	2.21627e-19
	TAG47:0-FA16:0	-2.82357	4.41886e-21	2.21627e-19
	TAG48:3-FA18:3	-2.43238	4.52421e-21	2.21627e-19
	TAG50:1-FA14:0	-2.18359	4.60284e-21	2.21627e-19
	TAG49:0-FA17:0	-2.62728	5.11212e-21	2.33544e-19
	TAG48:0-FA18:0	-2.83502	5.47823e-21	2.33544e-19
	TAG49:0-FA16:0	-2.56736	5.99277e-21	2.33544e-19
	TAG50:2-FA18:0	-2.10336	6.02228e-21	2.33544e-19
	TAG46:0-FA16:0	-3.06447	6.06293e-21	2.33544e-19
	TAG47:0-FA15:0	-2.77819	6.58213e-21	2.43792e-19
	TAG42:1-FA16:0	-3.30685	6.83946e-21	2.43941e-19
	TAG51:0-FA16:0	-2.35786	8.32899e-21	2.85015e-19
	TAG50:3-FA18:0	-2.18761	8.64684e-21	2.85015e-19
	TAG51:1-FA18:0	-2.19688	8.87897e-21	2.85015e-19
	TAG45:1-FA15:0	-2.91684	9.54736e-21	2.90713e-19
	TAG45:1-FA16:0	-2.28157	9.7832e-21	2.90713e-19
	TAG46:0-FA14:0	-3.03607	9.96212e-21	2.90713e-19
	TAG45:1-FA18:1	-2.61869	1.3185e-20	3.73446e-19
	TAG47:1-FA14:0	-2.57355	1.43038e-20	3.87016e-19
	TAG50:1-FA18:0	-2.27029	1.44679e-20	3.87016e-19
	TAG46:1-FA16:0	-2.8702	1.50488e-20	3.91677e-19
	TAG52:7-FA16:0	-2.35603	1.60352e-20	4.06365e-19
	TAG50:0-FA14:0	-2.52187	1.64969e-20	4.07347e-19
	TAG49:1-FA18:1	-2.15652	1.83656e-20	4.42151e-19
	TAG49:1-FA15:0	-2.1427	1.97216e-20	4.63218e-19
	TAG47:1-FA15:0	-2.52606	2.14411e-20	4.81806e-19
	TAG51:0-FA18:0	-2.54218	2.15522e-20	4.81806e-19
	TAG48:1-FA14:1	-2.6323	2.2014e-20	4.81806e-19
	TAG46:1-FA14:0	-2.69648	2.41689e-20	5.17214e-19
	TAG49:1-FA17:0	-2.39136	2.89105e-20	6.05235e-19
	TAG47:0-FA14:0	-2.94547	3.35313e-20	6.87035e-19
	TAG47:1-FA16:0	-2.51613	3.44363e-20	6.90879e-19
	TAG47:0-FA17:0	-2.59916	3.6344e-20	7.14271e-19
	TAG48:2-FA18:1	-2.24488	4.27363e-20	8.23071e-19
	TAG46:1-FA14:1	-2.92438	4.35894e-20	8.23071e-19
	TAG44:2-FA16:0	-2.87003	4.69679e-20	8.69809e-19
	TAG49:1-FA16:0	-2.16791	6.79284e-20	1.23425e-18
	TAG45:0-FA16:0	-2.7671	7.1658e-20	1.2779e-18
	TAG48:1-FA16:0	-2.31146	8.34723e-20	1.46152e-18
	TAG52:1-FA20:0	-1.94948	8.56805e-20	1.46412e-18
	TAG49:2-FA17:0	-2.16652	8.66616e-20	1.46412e-18
	TAG49:3-FA18:3	-2.14148	8.98002e-20	1.48426e-18
	TAG49:2-FA14:0	-2.11217	9.23922e-20	1.48426e-18
	TAG48:4-FA16:0	-2.26136	9.35872e-20	1.48426e-18
	TAG46:1-FA18:1	-2.78617	9.40189e-20	1.48426e-18
	TAG48:2-FA18:2	-2.08711	1.03859e-19	1.5887e-18
	TAG44:3-FA18:2	-2.93381	1.03934e-19	1.5887e-18
	TAG44:1-FA14:1	-3.15178	1.15199e-19	1.73339e-18
	TAG46:2-FA14:0	-2.48762	1.34138e-19	1.9873e-18
	TAG49:3-FA16:0	-1.94191	1.57432e-19	2.29708e-18
	TAG51:0-FA17:0	-2.30772	1.71786e-19	2.4691e-18
	TAG51:3-FA18:3	-1.9891	2.56145e-19	3.62746e-18
	TAG46:3-FA18:1	-2.72146	2.83113e-19	3.95127e-18
	TAG51:1-FA15:0	-1.96555	3.026e-19	4.16292e-18
	TAG46:2-FA14:1	-2.69891	3.51068e-19	4.73015e-18
	TAG48:2-FA16:0	-2.13865	3.59044e-19	4.73015e-18
	TAG48:2-FA14:1	-2.34018	3.64976e-19	4.73015e-18
	TAG45:0-FA15:0	-3.11758	3.71896e-19	4.73015e-18
	TAG44:1-FA18:1	-3.05662	3.73546e-19	4.73015e-18
	TAG51:1-FA16:0	-2.05457	3.76207e-19	4.73015e-18
	TAG47:2-FA14:0	-2.27731	3.78215e-19	4.73015e-18
	TAG50:0-FA18:0	-2.45089	3.90883e-19	4.8259e-18
	TAG45:0-FA14:0	-3.17	4.10785e-19	5.00742e-18
	TAG53:1-FA16:0	-2.1194	4.28603e-19	5.1593e-18
	TAG47:2-FA15:0	-2.23543	4.48878e-19	5.33666e-18
	TAG46:3-FA14:1	-2.4029	4.97669e-19	5.84457e-18
	TAG48:2-FA14:0	-2.00665	5.43201e-19	6.30244e-18
	TAG48:0-FA16:0	-2.57623	5.58045e-19	6.39759e-18
	TAG51:1-FA18:1	-1.95623	6.23693e-19	7.06608e-18
	TAG46:3-FA18:2	-2.55079	6.99378e-19	7.83141e-18
	TAG46:3-FA16:0	-2.72698	8.05295e-19	8.87504e-18
	TAG46:2-FA16:0	-2.61272	8.11011e-19	8.87504e-18
	TAG48:4-FA14:1	-2.06387	8.39627e-19	9.08495e-18
	TAG53:1-FA18:0	-2.05623	1.00063e-18	1.07067e-17
	TAG44:2-FA16:1	-2.78858	1.06735e-18	1.12952e-17
	TAG46:3-FA14:0	-2.59976	1.25657e-18	1.3153e-17
	TAG52:0-FA20:0	-2.15557	1.35862e-18	1.40683e-17
	DAG(14:0/16:0)	-2.02576	1.38646e-18	1.42038e-17
	TAG49:2-FA16:0	-1.86609	1.5576e-18	1.57891e-17
	TAG46:1-FA12:0	-2.85569	1.94558e-18	1.95166e-17
	TAG51:1-FA17:0	-1.99113	2.08732e-18	2.0591e-17
	TAG47:2-FA18:2	-2.19079	2.09545e-18	2.0591e-17
	TAG50:2-FA14:0	-1.75652	2.33839e-18	2.27462e-17
	TAG46:0-FA18:0	-3.16396	2.47572e-18	2.38412e-17
	TAG51:2-FA18:0	-1.50152	2.5599e-18	2.44077e-17
	TAG42:1-FA14:0	-3.3715	2.80326e-18	2.64661e-17
	TAG52:8-FA18:2	-1.67545	2.88227e-18	2.69478e-17
	TAG48:2-FA18:0	-2.58354	3.02684e-18	2.80274e-17
	TAG48:3-FA14:1	-2.04919	3.0692e-18	2.81489e-17
	TAG50:3-FA14:1	-1.79763	3.10256e-18	2.81865e-17
	TAG44:1-FA14:0	-3.14717	3.28569e-18	2.95712e-17
	TAG44:1-FA16:1	-2.94553	3.90746e-18	3.48415e-17
	TAG48:1-FA12:0	-2.76187	4.3285e-18	3.82417e-17
	TAG48:4-FA18:3	-2.40859	4.41169e-18	3.8301e-17
	TAG50:2-FA20:2	-2.21332	4.41638e-18	3.8301e-17
	TAG54:0-FA16:0	-1.99814	4.45453e-18	3.8301e-17
	TAG44:0-FA16:0	-3.29212	4.92531e-18	4.19741e-17
	TAG44:0-FA14:0	-3.2656	5.33783e-18	4.50906e-17
	TAG52:0-FA16:0	-2.14424	7.03703e-18	5.88178e-17
	TAG50:3-FA18:3	-1.92184	7.08501e-18	5.88178e-17
	TAG48:3-FA14:0	-1.97004	9.00263e-18	7.40986e-17
	TAG42:1-FA16:1	-2.76867	9.46043e-18	7.72067e-17
	TAG50:0-FA16:0	-2.17934	1.10634e-17	8.95295e-17
	TAG46:0-FA12:0	-3.09016	1.1586e-17	9.29774e-17
	DAG(14:0/18:1)	-1.65135	1.28289e-17	1.01294e-16
	TAG48:4-FA20:4	-2.51469	1.28327e-17	1.01294e-16
	TAG49:2-FA18:1	-1.85368	1.37934e-17	1.07992e-16
	TAG53:2-FA16:0	-1.74295	1.44085e-17	1.11898e-16
	TAG53:1-FA18:1	-1.80645	1.46023e-17	1.12496e-16
	TAG46:3-FA18:3	-2.93533	1.56275e-17	1.19439e-16
	TAG52:5-FA22:5	-1.67323	1.64479e-17	1.24719e-16
	TAG46:2-FA18:2	-2.53756	1.73747e-17	1.30717e-16
	DAG(15:0/18:1)	-1.42512	1.77352e-17	1.32395e-16
	TAG48:3-FA18:2	-1.99862	1.84498e-17	1.3667e-16
	TAG51:2-FA18:2	-1.67594	2.25156e-17	1.65515e-16
	TAG46:2-FA12:0	-2.55438	2.32178e-17	1.69384e-16
	TAG44:1-FA12:0	-3.15549	2.711e-17	1.96293e-16
	TAG49:2-FA15:0	-1.76425	2.80888e-17	2.01862e-16
	TAG49:2-FA18:2	-1.81627	3.30646e-17	2.35861e-16
	TAG53:1-FA17:0	-1.79773	4.00122e-17	2.83321e-16
	TAG46:1-FA16:1	-2.64967	4.71598e-17	3.31496e-16
	TAG50:5-FA20:4	-2.14921	5.25108e-17	3.66434e-16
	TAG42:0-FA16:0	-3.30067	5.68962e-17	3.9418e-16
	TAG44:2-FA18:2	-2.85789	6.31482e-17	4.34369e-16
	TAG52:2-FA20:0	-1.48466	6.38734e-17	4.36025e-16
	TAG53:2-FA18:0	-1.37539	6.42945e-17	4.36025e-16
	TAG52:0-FA18:0	-2.18591	6.99912e-17	4.71339e-16
	TAG52:4-FA22:4	-1.89561	7.74492e-17	5.17942e-16
	TAG53:4-FA16:0	-1.56606	8.27279e-17	5.49427e-16
	TAG48:4-FA14:0	-2.08461	8.90138e-17	5.87125e-16
	TAG50:1-FA20:1	-2.41809	9.91708e-17	6.4967e-16
	TAG50:1-FA18:1	-1.75367	1.03781e-16	6.75279e-16
	DAG(16:0/18:0)	-1.57105	1.25227e-16	8.09351e-16
	TAG52:5-FA14:0	-1.76417	1.28088e-16	8.22323e-16
	TAG46:3-FA12:0	-2.53413	1.30608e-16	8.23207e-16
	TAG52:1-FA18:0	-1.8471	1.30696e-16	8.23207e-16
	TAG50:4-FA20:4	-2.20467	1.3079e-16	8.23207e-16
	TAG51:4-FA20:4	-1.81333	1.42467e-16	8.90881e-16
	TAG49:3-FA15:0	-1.70169	1.48037e-16	9.19742e-16
	TAG54:1-FA20:0	-1.70434	1.49089e-16	9.20336e-16
	TAG48:3-FA18:1	-2.14394	1.55988e-16	9.56795e-16
	TAG50:4-FA18:3	-1.74455	1.57777e-16	9.61641e-16
	TAG48:2-FA12:0	-2.33666	1.77197e-16	1.07321e-15
	TAG46:3-FA16:1	-2.19581	1.93664e-16	1.16562e-15
	TAG44:0-FA12:0	-3.25822	2.0464e-16	1.22403e-15
	TAG50:4-FA18:1	-1.8192	2.11375e-16	1.25651e-15
	TAG50:1-FA16:0	-1.69948	2.30437e-16	1.36141e-15
	TAG46:2-FA16:1	-2.39882	3.09343e-16	1.81645e-15
	TAG52:4-FA14:0	-1.74121	3.52313e-16	2.05623e-15
	TAG48:4-FA18:1	-2.50336	4.31651e-16	2.50409e-15
	TAG44:2-FA12:0	-2.936	4.38809e-16	2.53038e-15
	TAG50:3-FA20:3	-2.15239	4.55591e-16	2.61151e-15
	TAG50:3-FA18:1	-1.51118	4.76534e-16	2.7154e-15
	TAG48:4-FA16:1	-1.90936	5.11411e-16	2.89699e-15
	TAG52:4-FA18:0	-1.60314	5.24489e-16	2.9537e-15
	TAG44:2-FA14:0	-2.87343	5.51537e-16	3.08797e-15
	TAG50:4-FA14:1	-1.56832	6.59827e-16	3.67291e-15
	TAG42:1-FA18:1	-3.37276	6.64985e-16	3.68035e-15
	DAG(14:0/18:2)	-1.40107	6.7078e-16	3.69121e-15
	TAG49:3-FA18:2	-1.57011	7.77656e-16	4.25501e-15
	TAG51:3-FA17:0	-1.56781	8.15344e-16	4.42603e-15
	DAG(15:0/18:2)	-1.05244	8.18103e-16	4.42603e-15
	TAG53:3-FA16:0	-1.54674	9.1076e-16	4.89979e-15
	TAG50:5-FA14:1	-1.6317	1.01552e-15	5.43305e-15
	TAG51:2-FA17:0	-1.63323	1.11595e-15	5.93734e-15
	TAG52:3-FA18:0	-1.58312	1.1332e-15	5.96537e-15
	DAG(16:0/16:0)	-1.81156	1.13361e-15	5.96537e-15
	TAG54:0-FA18:0	-2.23465	1.24295e-15	6.50524e-15
	DAG(12:0/18:1)	-1.93596	1.32805e-15	6.91303e-15
	TAG54:1-FA18:1	-1.81589	1.58259e-15	8.19375e-15
	TAG49:1-FA16:1	-2.10967	1.64597e-15	8.47632e-15
	TAG50:5-FA18:1	-1.81706	1.71592e-15	8.78955e-15
	TAG51:2-FA18:1	-1.55969	1.77258e-15	8.98716e-15
	TAG51:4-FA16:0	-0.622039	1.77317e-15	8.98716e-15
	TAG47:1-FA16:1	-1.89083	2.07558e-15	1.04649e-14
	TAG54:1-FA16:0	-1.9946	2.65851e-15	1.33341e-14
	TAG46:4-FA18:2	-2.49136	2.82887e-15	1.41151e-14
	TAG51:2-FA16:0	-1.61094	2.877e-15	1.42812e-14
	TAG52:3-FA14:0	-1.69975	3.03665e-15	1.49964e-14
	TAG54:2-FA20:0	-1.42257	3.12876e-15	1.53724e-14
	TAG54:1-FA18:0	-1.97176	3.18866e-15	1.55872e-14
	TAG50:2-FA18:1	-1.51157	3.60337e-15	1.75255e-14
	TAG52:1-FA20:1	-2.01358	3.70845e-15	1.79459e-14
	DAG(14:1/16:0)	-1.30132	3.84542e-15	1.85157e-14
	TAG52:1-FA16:0	-1.64988	3.99746e-15	1.9152e-14
	TAG53:2-FA18:2	-1.50635	4.25932e-15	2.03056e-14
	TAG51:4-FA18:3	-1.6402	4.43298e-15	2.10293e-14
	TAG50:6-FA20:4	-1.85364	4.97547e-15	2.34871e-14
	TAG55:2-FA18:1	-1.83178	5.15384e-15	2.42105e-14
	TAG53:4-FA20:4	-1.69458	5.33885e-15	2.49578e-14
	TAG50:4-FA16:0	-1.66697	6.1141e-15	2.84438e-14
	TAG52:3-FA18:3	-1.62627	6.35813e-15	2.94369e-14
	DAG(12:0/16:0)	-1.86877	7.29161e-15	3.35972e-14
	TAG52:2-FA18:0	-1.5651	7.91748e-15	3.63073e-14
	TAG50:3-FA14:0	-1.49	9.20089e-15	4.19927e-14
	TAG52:1-FA16:1	-1.77048	1.00841e-14	4.58066e-14
	TAG50:4-FA20:3	-1.94927	1.02267e-14	4.62361e-14
	TAG52:8-FA16:1	-1.90995	1.03073e-14	4.6383e-14
	TAG40:0-FA16:0	-3.40848	1.065e-14	4.77019e-14
	TAG42:0-FA14:0	-3.37442	1.0994e-14	4.90151e-14
	TAG50:2-FA18:2	-1.55846	2.28835e-14	1.01552e-13
	TAG52:1-FA18:1	-1.52742	2.85603e-14	1.26163e-13
	TAG52:2-FA20:2	-1.76832	3.48469e-14	1.53231e-13
	TAG42:2-FA18:2	-2.92455	4.51208e-14	1.97506e-13
	TAG50:5-FA16:0	-1.7488	5.77174e-14	2.51501e-13
	TAG51:2-FA15:0	-1.44763	5.92759e-14	2.57129e-13
	DAG(16:0/18:3)	-1.41154	6.1541e-14	2.65758e-13
	TAG56:1-FA18:1	-1.87335	6.49063e-14	2.79039e-13
	TAG50:3-FA18:2	-1.36579	7.35624e-14	3.14847e-13
	TAG53:5-FA20:4	-1.44243	7.6216e-14	3.24761e-13
	TAG54:5-FA22:5	-1.47816	7.8718e-14	3.33944e-13
	TAG52:2-FA14:0	-1.8872	8.82724e-14	3.72835e-13
	TAG48:1-FA16:1	-2.20445	9.98189e-14	4.19762e-13
	TAG47:2-FA16:1	-2.07191	1.01545e-13	4.25166e-13
	TAG52:6-FA20:4	-1.5036	1.18635e-13	4.94569e-13
	TAG42:0-FA12:0	-3.44573	1.27926e-13	5.31005e-13
	TAG50:5-FA18:3	-1.66286	1.29533e-13	5.35364e-13
	DAG(12:0/18:2)	-1.48817	1.33335e-13	5.48724e-13
	TAG53:2-FA18:1	-1.43543	1.34841e-13	5.52562e-13
	TAG54:1-FA20:1	-1.79172	1.59136e-13	6.49357e-13
	TAG52:6-FA16:0	-1.66157	1.6156e-13	6.56467e-13
	TAG54:3-FA18:3	-1.54603	1.63148e-13	6.60131e-13
	TAG48:5-FA18:3	-2.24365	1.64457e-13	6.62647e-13
	TAG52:6-FA14:0	-1.68426	1.69203e-13	6.78928e-13
	TAG54:2-FA18:2	-1.44629	1.71986e-13	6.87231e-13
	TAG50:4-FA14:0	-1.56751	1.74268e-13	6.93471e-13
	TAG55:7-FA18:1	-0.889064	1.77709e-13	7.04256e-13
	TAG50:3-FA16:0	-1.48354	1.78982e-13	7.06393e-13
	TAG48:3-FA12:0	-2.10938	2.14106e-13	8.41568e-13
	TAG52:4-FA20:4	-1.74948	2.20051e-13	8.6142e-13
	DAG(14:0/20:4)	-1.49039	2.2471e-13	8.76094e-13
	TAG52:2-FA20:1	-1.75672	2.98606e-13	1.15951e-12
	TAG52:3-FA20:2	-1.48971	3.13735e-13	1.20875e-12
	TAG55:3-FA18:1	-1.58131	3.13797e-13	1.20875e-12
	TAG53:4-FA18:3	-1.50601	3.84833e-13	1.47647e-12
	TAG50:2-FA16:0	-1.44759	4.09962e-13	1.56664e-12
	PE(18:0/18:1)	-1.068	4.16899e-13	1.58685e-12
	TAG54:2-FA18:0	-1.56271	4.23601e-13	1.60601e-12
	TAG49:2-FA16:1	-1.73968	4.84107e-13	1.82821e-12
	TAG52:4-FA20:2	-1.20599	5.38986e-13	2.02751e-12
	DAG(16:0/18:1)	-1.36404	5.73243e-13	2.14799e-12
	TAG50:5-FA20:5	-1.98758	7.30981e-13	2.72537e-12
	TAG40:0-FA14:0	-3.04398	7.32991e-13	2.72537e-12
	TAG51:2-FA16:1	-1.65022	7.47845e-13	2.7699e-12
	TAG56:1-FA16:0	-2.22417	8.57707e-13	3.16464e-12
	TAG52:5-FA20:4	-1.6609	8.78516e-13	3.22905e-12
	TAG51:3-FA18:2	-1.28715	9.36164e-13	3.42786e-12
	TAG53:2-FA17:0	-1.37509	1.01211e-12	3.69189e-12
	DAG(18:0/18:1)	-1.34243	1.13384e-12	4.12034e-12
	DAG(14:0/14:0)	-1.25619	1.17543e-12	4.2554e-12
	TAG54:2-FA20:2	-1.43816	1.24216e-12	4.48016e-12
	TAG54:2-FA16:0	-1.46825	1.31765e-12	4.73468e-12
	TAG50:1-FA16:1	-1.82019	1.34198e-12	4.80418e-12
	TAG51:3-FA18:1	-0.712857	1.43033e-12	5.1015e-12
	TAG50:5-FA14:0	-1.72809	1.46725e-12	5.21388e-12
	TAG53:6-FA20:4	-1.22873	1.49577e-12	5.2957e-12
	TAG54:4-FA22:4	-1.73556	1.52163e-12	5.3675e-12
	TAG48:3-FA16:1	-1.72505	1.52752e-12	5.36861e-12
	TAG54:2-FA18:1	-1.47813	1.54451e-12	5.4086e-12
	TAG52:6-FA22:6	-1.88175	1.58657e-12	5.53576e-12
	TAG48:5-FA18:2	-2.19202	1.80544e-12	6.27667e-12
	TAG48:4-FA18:2	-1.88996	1.85389e-12	6.41561e-12
	TAG48:4-FA12:0	-2.22946	1.85873e-12	6.41561e-12
	TAG52:2-FA18:2	-1.30264	2.45413e-12	8.44045e-12
	TAG54:3-FA16:0	-1.24523	2.76079e-12	9.46137e-12
	TAG52:4-FA18:3	-1.3896	3.00292e-12	1.02547e-11
	TAG56:2-FA18:0	-1.73071	3.05648e-12	1.04007e-11
	TAG51:3-FA16:0	-0.444717	3.41794e-12	1.15897e-11
	TAG50:5-FA18:2	-1.62476	3.60409e-12	1.2159e-11
	TAG54:6-FA22:5	-1.3413	3.6111e-12	1.2159e-11
	TAG51:4-FA18:1	-0.868981	4.13974e-12	1.38905e-11
	DAG(14:0/16:1)	-1.36212	4.20932e-12	1.40749e-11
	TAG52:7-FA22:6	-1.76926	4.49471e-12	1.49772e-11
	TAG56:3-FA18:0	-1.31864	4.61965e-12	1.53404e-11
	TAG54:5-FA22:4	-1.58867	4.72431e-12	1.56341e-11
	TAG52:3-FA20:3	-1.68981	4.79855e-12	1.58254e-11
	TAG48:2-FA16:1	-1.90671	5.4003e-12	1.77491e-11
	TAG49:3-FA16:1	-1.43999	5.80821e-12	1.90249e-11
	TAG55:5-FA18:1	-1.17818	5.85932e-12	1.90873e-11
	TAG54:2-FA20:1	-1.45528	5.86692e-12	1.90873e-11
	TAG54:4-FA20:4	-1.38136	5.95781e-12	1.93177e-11
	TAG42:1-FA12:0	-3.48392	6.02626e-12	1.94741e-11
	TAG54:5-FA16:0	-1.24744	7.37113e-12	2.37405e-11
	DAG(16:0/18:2)	-0.997697	9.58536e-12	3.0769e-11
	TAG52:3-FA20:1	-1.42271	1.01526e-11	3.24817e-11
	TAG50:4-FA18:2	-1.26521	1.07746e-11	3.43573e-11
	TAG52:5-FA20:3	-1.36936	1.2312e-11	3.91302e-11
	TAG55:3-FA18:2	-1.47573	1.24909e-11	3.95681e-11
	TAG56:5-FA22:5	-1.1744	1.28129e-11	4.04553e-11
	TAG56:10-FA18:2	-1.48811	1.36194e-11	4.28612e-11
	TAG52:2-FA18:1	-0.95833	1.43134e-11	4.48983e-11
	TAG54:7-FA22:5	-1.19942	2.0941e-11	6.54747e-11
	TAG54:4-FA16:0	-1.24457	2.9093e-11	9.06684e-11
	TAG52:2-FA16:1	-1.38585	2.97819e-11	9.25162e-11
	TAG55:5-FA20:4	-1.18292	3.0724e-11	9.51357e-11
	TAG52:2-FA16:0	-1.06695	3.99782e-11	1.23394e-10
	TAG53:3-FA18:1	-0.849747	4.0268e-11	1.23892e-10
	TAG55:4-FA18:1	-1.3838	4.12898e-11	1.26631e-10
	TAG54:3-FA20:3	-1.38378	4.23693e-11	1.29529e-10
	TAG54:4-FA18:3	-1.52828	4.65008e-11	1.4171e-10
	PE(18:0/18:2)	-0.941861	5.12873e-11	1.55803e-10
	TAG56:4-FA22:4	-1.41266	5.56704e-11	1.68587e-10
	TAG52:4-FA20:3	-1.53597	6.14578e-11	1.85529e-10
	DAG(14:1/18:1)	-1.31359	6.18349e-11	1.86084e-10
	TAG56:2-FA20:0	-1.60687	6.4671e-11	1.94013e-10
	DAG(18:0/18:2)	-0.869223	6.62789e-11	1.98219e-10
	TAG51:3-FA15:0	-1.20586	7.25845e-11	2.16405e-10
	TAG53:3-FA18:2	-1.15199	7.80665e-11	2.32031e-10
	TAG53:0-FA16:0	-1.2528	7.95327e-11	2.35662e-10
	TAG54:3-FA20:2	-1.19479	8.06558e-11	2.38256e-10
	TAG54:6-FA16:0	-1.18855	8.37764e-11	2.46718e-10
	DAG(16:0/16:1)	-1.55875	9.05231e-11	2.65774e-10
	TAG56:3-FA20:2	-1.17776	9.54227e-11	2.79307e-10
	TAG51:4-FA15:0	-1.25415	9.94962e-11	2.90348e-10
	DAG(18:0/18:3)	-1.11115	1.02485e-10	2.98166e-10
	TAG52:5-FA20:5	-1.59485	1.41053e-10	4.09139e-10
	TAG51:3-FA16:1	-1.36101	1.42881e-10	4.13197e-10
	TAG51:4-FA16:1	-1.19225	1.70861e-10	4.92632e-10
	TAG40:0-FA12:0	-3.37339	1.94797e-10	5.59968e-10
	TAG52:4-FA22:1	-1.14282	2.02833e-10	5.81333e-10
	TAG52:5-FA16:0	-1.29703	2.31896e-10	6.62659e-10
	TAG54:5-FA18:0	-1.37796	2.43401e-10	6.93477e-10
	TAG51:5-FA18:3	-1.35618	2.57561e-10	7.31657e-10
	TAG52:5-FA18:1	-1.23946	2.65001e-10	7.50576e-10
	TAG50:2-FA16:1	-1.51141	2.68252e-10	7.57557e-10
	TAG54:3-FA18:0	-1.18644	3.14197e-10	8.84712e-10
	DAG(14:0/20:0)	-0.824416	3.42778e-10	1e-09
	TAG42:2-FA12:0	-3.12802	3.52043e-10	1e-09
	TAG53:5-FA18:3	-1.11623	3.52082e-10	1e-09
	TAG54:4-FA20:2	-1.02577	3.87896e-10	1.07961e-09
	TAG58:7-FA16:0	-1.18335	4.47419e-10	1.24168e-09
	TAG56:2-FA20:1	-1.66673	7.21881e-10	2e-09
	TAG54:6-FA22:6	-1.50256	7.94673e-10	2.19275e-09
	TAG54:3-FA18:2	-1.15993	8.21945e-10	2.26152e-09
	TAG55:6-FA20:4	-0.848599	1e-09	2.65183e-09
	PE(16:0/18:1)	-0.94465	1.14634e-09	3.13617e-09
	TAG56:2-FA18:1	-1.48239	1.23747e-09	3.37586e-09
	TAG52:6-FA18:1	-1.33914	1.24856e-09	3.39651e-09
	TAG54:5-FA20:4	-1.16449	1.30273e-09	3.53387e-09
	TAG56:5-FA16:0	-1.16725	1.32529e-09	3.58498e-09
	TAG52:4-FA18:1	-1.11522	1.33237e-09	3.59405e-09
	TAG52:3-FA18:1	-0.902501	1.34166e-09	3.609e-09
	TAG53:3-FA17:0	-1.07643	1.41099e-09	3.78491e-09
	TAG52:3-FA20:0	-1.05039	1.47099e-09	3.9349e-09
	TAG54:3-FA20:1	-1.17937	1.49838e-09	4e-09
	TAG54:5-FA20:2	-1.00573	1.75246e-09	4.66192e-09
	TAG53:4-FA17:0	-1.08923	2e-09	5.41436e-09
	DAG(16:1/18:0)	-0.974584	2e-09	5.417e-09
	TAG56:4-FA16:0	-1.29405	2.06665e-09	5.45256e-09
	TAG56:4-FA18:0	-1.08605	2.25926e-09	5.94444e-09
	TAG55:4-FA18:2	-1.30283	2.33656e-09	6.13107e-09
	TAG52:5-FA18:3	-1.18485	2.65417e-09	6.9299e-09
	TAG56:5-FA22:4	-1.20572	2.65538e-09	6.9299e-09
	TAG52:3-FA18:2	-0.921136	3.19403e-09	8.31312e-09
	DAG(16:0/20:4)	-1.00747	3.29583e-09	8.55495e-09
	DAG(12:0/18:0)	-0.92854	3.34026e-09	8.64695e-09
	TAG52:6-FA20:5	-1.44742	3.39283e-09	8.75951e-09
	TAG54:4-FA20:3	-1.18861	3.73563e-09	9.61875e-09
	TAG52:3-FA22:1	-1.06766	3.84705e-09	9.87921e-09
	TAG50:5-FA16:1	-1.36407	4e-09	1.01273e-08
	TAG58:6-FA18:0	-1.01797	4e-09	1.01848e-08
	TAG44:0-FA18:0	-0.9838	4.22186e-09	1.07557e-08
	TAG52:3-FA16:0	-0.925232	4.23988e-09	1.07731e-08
	TAG54:4-FA18:0	-1.16989	5.44346e-09	1.37949e-08
	TAG54:5-FA20:5	-1.30832	5.93539e-09	1.5e-08
	TAG54:7-FA20:4	-1.07308	6.36819e-09	1.60538e-08
	TAG54:4-FA20:1	-1.26367	7e-09	1.75197e-08
	TAG54:3-FA18:1	-1.05436	7.28104e-09	1.82595e-08
	DAG(18:2/22:4)	-0.737361	7.48792e-09	1.87295e-08
	DAG(18:1/20:1)	-1.0479	8e-09	1.98522e-08
	TAG56:3-FA20:0	-1.38549	8.19908e-09	2.04024e-08
	TAG51:5-FA18:2	-1.21805	8.56053e-09	2.12469e-08
	PE(18:1/18:1)	-1.14376	8.76666e-09	2.17026e-08
	TAG58:2-FA18:1	-2.05348	1.07149e-08	2.64576e-08
	TAG56:3-FA18:2	-1.48169	1.3e-08	3.18954e-08
	TAG56:6-FA22:5	-0.954589	1.31117e-08	3.22107e-08
	TAG54:6-FA16:1	-1.07488	1.31519e-08	3.22271e-08
	TAG56:6-FA16:0	-0.954914	1.48422e-08	3.62767e-08
	TAG56:7-FA18:0	-1.06185	1.6192e-08	3.94757e-08
	TAG54:6-FA20:4	-1.01126	1.76096e-08	4.27352e-08
	TAG50:3-FA16:1	-1.24617	1.76177e-08	4.27352e-08
	TAG50:4-FA16:1	-1.23124	1.84617e-08	4.46699e-08
	DAG(18:1/22:4)	-0.895777	1.87876e-08	4.53445e-08
	TAG54:4-FA16:1	-1.02939	1.89199e-08	4.55498e-08
	TAG52:4-FA16:0	-1.01814	1.96588e-08	4.72105e-08
	PE(16:0/18:2)	-0.86324	2.03222e-08	4.86823e-08
	CE(18:2)	-0.313725	2.33054e-08	5.569e-08
	TAG54:5-FA16:1	-1.06682	2.36544e-08	5.63841e-08
	TAG58:6-FA22:5	-0.945343	2.5134e-08	5.97631e-08
	TAG56:6-FA22:4	-0.991938	2.57783e-08	6.11441e-08
	TAG54:3-FA16:1	-1.18622	2.67335e-08	6.3254e-08
	TAG52:6-FA18:3	-1.32619	2.79176e-08	6.58936e-08
	TAG54:7-FA18:1	-1.43305	3.53645e-08	8.32666e-08
	PE(18:0/20:3)	-0.890424	3.67316e-08	8.62745e-08
	TAG55:7-FA15:0	-1.04067	3.71069e-08	8.6944e-08
	TAG56:7-FA22:4	-0.975461	3.87038e-08	9.04654e-08
	TAG56:6-FA18:1	-0.882165	3.99088e-08	9.30562e-08
	TAG51:4-FA18:2	-1.02078	4.2e-08	9.7741e-08
	TAG56:5-FA18:1	-0.963488	4.21487e-08	9.78052e-08
	TAG52:7-FA20:5	-1.29228	4.44411e-08	1.02877e-07
	TAG56:4-FA18:1	-1.06097	4.93438e-08	1.14e-07
	DAG(16:1/18:3)	-1.10071	5.22402e-08	1.20352e-07
	PC(14:0/20:3)	-0.801575	5.50565e-08	1.26538e-07
	TAG53:4-FA18:1	-0.225014	5.61396e-08	1.2872e-07
	TAG56:4-FA20:3	-0.980248	6.07585e-08	1.39e-07
	TAG54:6-FA20:3	-0.996616	6.08958e-08	1.39e-07
	TAG52:4-FA20:0	-0.9839	6.21708e-08	1.41538e-07
	DAG(18:1/18:1)	-0.985313	6.37512e-08	1.44793e-07
	TAG56:6-FA22:6	-1.21091	6.51485e-08	1.47619e-07
	TAG54:7-FA22:6	-1.31676	7.12308e-08	1.61e-07
	TAG53:4-FA18:2	-0.868605	7.19476e-08	1.62261e-07
	DAG(16:0/20:3)	-0.842442	7.21966e-08	1.62442e-07
	TAG58:6-FA16:0	-1.04079	7.42554e-08	1.66685e-07
	TAG38:0-FA12:0	-2.5207	8.28299e-08	1.85363e-07
	TAG54:8-FA20:4	-1.13956	8.31196e-08	1.85363e-07
	TAG56:3-FA18:1	-1.34347	8.31536e-08	1.85363e-07
	TAG55:1-FA18:1	-1.00924	9.11158e-08	2.02643e-07
	PC(16:0/18:3)	-0.733077	1.11911e-07	2.48318e-07
	TAG54:6-FA20:5	-1.1201	1.18381e-07	2.62071e-07
	DAG(16:0/22:5)	-0.776682	1.19203e-07	2.63287e-07
	TAG56:2-FA16:0	-1.81416	1.23778e-07	2.72764e-07
	TAG56:4-FA20:2	-0.934709	1.39665e-07	3.07072e-07
	TAG58:6-FA18:1	-0.88764	1.49319e-07	3.27549e-07
	PE(16:0/20:3)	-0.845539	1.51943e-07	3.32547e-07
	PE(18:1/18:2)	-0.928734	1.68421e-07	3.67615e-07
	TAG55:7-FA22:6	-1.13379	1.68729e-07	3.67615e-07
	TAG56:3-FA16:0	-1.48116	1.80765e-07	3.9295e-07
	TAG58:6-FA22:4	-0.875102	1.85622e-07	4.02599e-07
	PC(16:0/14:0)	-0.831037	1.98515e-07	4.29596e-07
	TAG52:3-FA16:1	-1.01392	2.03e-07	4.38405e-07
	DAG(16:1/18:1)	-1.19231	2.08286e-07	4.48724e-07
	TAG56:4-FA20:4	-1.00068	2.19901e-07	4.72689e-07
	TAG54:5-FA18:3	-1.25556	2.49241e-07	5.34563e-07
	TAG53:4-FA18:0	-0.145696	2.52372e-07	5.40077e-07
	TAG52:6-FA16:1	-1.04277	2.64139e-07	5.64e-07
	DAG(16:1/18:2)	-0.971447	2.66241e-07	5.67235e-07
	TAG54:5-FA20:3	-0.944247	2.857e-07	6.0735e-07
	TAG52:6-FA18:2	-1.06867	2.86387e-07	6.07469e-07
	TAG55:5-FA18:2	-1.1176	2.95764e-07	6.25505e-07
	TAG56:3-FA20:1	-1.32748	2.96189e-07	6.25505e-07
	PI(16:0/18:2)	-0.8935	3.04764e-07	6.42206e-07
	PE(18:0/18:3)	-0.861162	3.33618e-07	7.01471e-07
	TAG56:8-FA18:1	-0.957967	3.59699e-07	7.53365e-07
	PE(P-16:0/20:3)	-0.675825	3.59863e-07	7.53365e-07
	TAG55:6-FA18:1	-0.286199	4.57556e-07	9.55805e-07
	DCER(16:0)	-0.399551	4.65121e-07	9.69506e-07
	TAG56:6-FA18:0	-0.869119	4.81573e-07	1.00163e-06
	TAG58:5-FA18:1	-1.0657	4.93472e-07	1.02417e-06
	TAG56:5-FA18:0	-0.895927	5.59867e-07	1.15947e-06
	DAG(18:1/20:4)	-0.981231	5.81073e-07	1.2008e-06
	TAG56:6-FA18:3	-1.10391	5.83882e-07	1.204e-06
	PC(18:0/18:3)	-0.748272	6.25147e-07	1.28636e-06
	CE(14:1)	-1.002	6.74575e-07	1.38511e-06
	TAG56:7-FA16:0	-0.914044	6.96346e-07	1.42677e-06
	DAG(16:1/20:0)	-0.719583	7.5184e-07	1.5372e-06
	TAG58:7-FA18:0	-0.963834	8.33888e-07	1.70134e-06
	TAG54:5-FA18:1	-1.10595	8.78499e-07	1.78857e-06
	TAG54:4-FA18:1	-0.94462	8.8883e-07	1.80579e-06
	TAG56:7-FA22:5	-0.767501	9.27055e-07	1.87948e-06
	TAG56:7-FA18:3	-0.969739	9.30187e-07	1.88187e-06
	TAG54:8-FA22:6	-1.15486	9.80233e-07	1.979e-06
	PC(14:0/18:1)	-0.612196	1.19953e-06	2.41664e-06
	TAG56:8-FA18:3	-0.954315	1.21162e-06	2.43589e-06
	TAG56:6-FA20:4	-0.817797	1.28142e-06	2.57086e-06
	TAG55:1-FA16:0	-0.954462	1.45272e-06	2.90847e-06
	TAG36:0-FA12:0	-2.71652	1.47111e-06	2.93916e-06
	TAG54:4-FA22:1	-1.03826	1.55395e-06	3.09825e-06
	TAG56:8-FA22:5	-0.845463	1.654e-06	3.2892e-06
	CE(14:0)	-0.720252	1.65656e-06	3.2892e-06
	TAG52:5-FA18:2	-0.938812	1.7457e-06	3.45908e-06
	TAG56:7-FA18:1	-0.864134	1.76993e-06	3.49989e-06
	TAG54:6-FA18:1	-1.16057	1.85493e-06	3.66044e-06
	DCER(22:2)	-0.574425	1.87564e-06	3.69374e-06
	DAG(16:1/16:1)	-0.884549	2.05861e-06	4.0458e-06
	TAG52:5-FA16:1	-0.861404	2.5345e-06	4.97093e-06
	TAG56:8-FA16:0	-0.933433	2.56591e-06	5.02231e-06
	TAG53:6-FA18:2	-0.192923	2.646e-06	5.16854e-06
	TAG54:4-FA18:2	-0.924508	2.69548e-06	5.25456e-06
	TAG54:7-FA16:1	-0.990824	2.81918e-06	5.4846e-06
	TAG56:4-FA18:2	-1.11841	3.2092e-06	6.23076e-06
	TAG58:7-FA18:1	-0.783289	3.49684e-06	6.77557e-06
	DAG(14:0/22:6)	-0.853865	4.20708e-06	8.13538e-06
	PC(14:0/18:2)	-0.503041	4.33152e-06	8.35922e-06
	TAG52:4-FA18:2	-0.772368	4.39836e-06	8.47124e-06
	TAG54:8-FA18:2	-1.23048	4.59573e-06	8.83371e-06
	DAG(16:1/20:4)	-1.13254	4.61328e-06	8.84979e-06
	DAG(18:1/20:2)	-0.792854	4.67039e-06	8.92425e-06
	TAG56:6-FA20:2	-0.786719	4.67064e-06	8.92425e-06
	TAG53:7-FA18:3	-0.211181	5.55864e-06	1.05999e-05
	TAG56:7-FA18:2	-0.724177	5.71689e-06	1.08802e-05
	DAG(18:1/18:2)	-0.759324	5.84728e-06	1.11064e-05
	PI(16:0/18:1)	-0.733799	5.86646e-06	1.11209e-05
	TAG53:3-FA18:0	-0.106337	5.93147e-06	1.1222e-05
	TAG56:6-FA18:2	-0.766523	6.13425e-06	1.15829e-05
	TAG58:7-FA18:2	-0.710586	6.424e-06	1.21063e-05
	TAG54:5-FA22:1	-1.03302	7.03221e-06	1.32266e-05
	TAG56:7-FA22:6	-0.978388	7.16442e-06	1.3449e-05
	PC(16:0/20:3)	-0.520474	7.30718e-06	1.36903e-05
	DAG(16:1/20:2)	-0.676101	7.4919e-06	1.40091e-05
	TAG56:5-FA18:2	-0.859861	8.17033e-06	1.52481e-05
	TAG58:7-FA22:4	-0.727494	8.31291e-06	1.54842e-05
	TAG56:5-FA20:4	-0.823737	8.71983e-06	1.62108e-05
	LPE(18:1)	-0.605601	8.97833e-06	1.66592e-05
	TAG54:7-FA20:5	-0.922195	9.42531e-06	1.74549e-05
	PC(18:0/14:0)	-0.636392	9.5767e-06	1.77013e-05
	TAG58:7-FA22:5	-0.704139	1.00093e-05	1.84654e-05
	TAG56:5-FA20:2	-0.749534	1.05375e-05	1.94027e-05
	TAG56:4-FA20:1	-1.13001	1.08373e-05	1.99166e-05
	TAG56:5-FA20:3	-0.76713	1.12702e-05	2.06727e-05
	PE(O-18:0/18:1)	-0.52055	1.13209e-05	2.07263e-05
	PC(18:1/18:3)	-0.603367	1.16462e-05	2.12814e-05
	PC(15:0/20:3)	-0.799449	1.20813e-05	2.20347e-05
	TAG56:6-FA20:5	-0.973336	1.22944e-05	2.23809e-05
	DAG(16:0/22:6)	-0.787434	1.26694e-05	2.30201e-05
	TAG56:5-FA20:1	-1.19992	1.54109e-05	2.79485e-05
	DAG(18:0/22:6)	-0.640179	1.56938e-05	2.84081e-05
	TAG56:7-FA20:4	-0.734445	1.68902e-05	3.05165e-05
	TAG56:8-FA20:4	-0.808468	1.75616e-05	3.167e-05
	TAG54:8-FA20:5	-0.997615	1.793e-05	3.2274e-05
	TAG52:4-FA16:1	-0.7661	1.79857e-05	3.23138e-05
	DAG(14:0/18:3)	-1.35936	2.0255e-05	3.63231e-05
	TAG53:6-FA18:3	-0.11748	2.14181e-05	3.83376e-05
	CER(16:0)	-0.327759	2.33131e-05	4.16521e-05
	DAG(16:0/20:5)	-1.03376	2.39671e-05	4.27413e-05
	PE(P-18:0/20:3)	-0.550294	2.4044e-05	4.27993e-05
	DAG(18:2/20:4)	-0.812842	2.44205e-05	4.33892e-05
	TAG58:7-FA22:6	-1.00696	2.45794e-05	4.35911e-05
	TAG56:9-FA18:3	-0.960857	2.63478e-05	4.66414e-05
	TAG54:6-FA18:3	-1.11305	3.01691e-05	5.3308e-05
	TAG58:3-FA18:1	-1.72699	3.11744e-05	5.49835e-05
	DAG(18:1/22:5)	-0.725547	3.39627e-05	5.97918e-05
	PE(18:0/20:2)	-0.634725	3.44644e-05	6.05643e-05
	PE(O-18:0/18:2)	-0.504869	3.48111e-05	6.1062e-05
	PC(18:0/16:1)	-0.792149	3.51691e-05	6.15778e-05
	DCER(22:0)	-0.394548	3.55027e-05	6.20491e-05
	TAG56:7-FA16:1	-0.716606	4.32197e-05	7.53996e-05
	TAG56:7-FA20:3	-0.721448	4.35621e-05	7.58594e-05
	MAG(22:1)	-0.333515	4.6795e-05	8.13423e-05
	TAG54:7-FA18:3	-1.24269	4.92371e-05	8.5433e-05
	TAG56:9-FA20:4	-0.864477	5.19962e-05	9.00581e-05
	PC(16:0/18:2)	-0.309074	5.33706e-05	9.22726e-05
	DAG(18:2/18:3)	-0.829664	5.7953e-05	0.000100016
	PE(18:1/20:3)	-0.730684	6.17133e-05	0.000106315
	TAG58:6-FA20:4	-0.767098	6.48686e-05	0.000111551
	TAG54:8-FA18:3	-1.29741	7.44747e-05	0.000127842
	TAG58:7-FA20:4	-0.738693	7.96884e-05	0.000136548
	PC(18:0/18:0)	-0.34488	8.18573e-05	0.000140015
	PC(18:2/20:3)	-0.409982	8.55503e-05	0.000146073
	PE(18:0/20:4)	-0.568215	9.07717e-05	0.000154713
	PE(18:0/22:4)	-0.803152	9.15047e-05	0.000155687
	CE(17:0)	-0.43057	0.000103634	0.000176013
	TAG56:6-FA20:3	-0.64783	0.000106945	0.000181317
	CE(15:0)	-0.471844	0.000107596	0.000182101
	TAG58:9-FA22:5	-0.687069	0.000127321	0.000215106
	CE(12:0)	-0.763711	0.000130145	0.000219492
	PE(18:2/18:2)	-0.784187	0.000130443	0.00021961
	PE(P-18:1/20:3)	-0.492774	0.000135267	0.000227334
	TAG55:2-FA18:2	-0.757229	0.000137062	0.000229949
	PE(18:1/18:3)	-0.678003	0.000143782	0.000240804
	PI(16:0/20:4)	-0.646284	0.000144218	0.000241114
	PC(15:0/18:1)	-0.450175	0.000144487	0.000241146
	TAG54:6-FA18:2	-0.940803	0.000152206	0.000253183
	PE(18:1/20:4)	-0.508202	0.000152225	0.000253183
	LPC(20:3)	-0.466337	0.00015716	0.00026094
	PI(18:0/16:1)	-0.628855	0.000159671	0.000264653
	PC(14:0/20:4)	-0.525924	0.000167664	0.000277424
	DAG(18:1/20:3)	-0.765606	0.000171662	0.000283551
	PC(18:1/20:3)	-0.434055	0.000175352	0.000289151
	TAG54:7-FA18:2	-0.97137	0.000200504	0.000330061
	TAG56:8-FA18:2	-0.706169	0.000201881	0.00033176
	TAG54:5-FA18:2	-0.821283	0.000205887	0.000337767
	TAG56:7-FA20:5	-0.795235	0.000206771	0.00033864
	CE(18:3)	-0.48951	0.000211373	0.000345589
	PE(P-16:0/18:1)	-0.371743	0.000224258	0.000366034
	CE(18:1)	-0.300657	0.000237696	0.000387311
	DAG(18:1/20:5)	-0.892407	0.000249733	0.000406239
	PE(18:0/20:5)	-0.664054	0.000261924	0.000425351
	TAG53:5-FA18:1	-0.0975307	0.000262937	0.000426277
	PE(16:0/18:3)	-0.524919	0.000267108	0.000432312
	TAG58:8-FA20:4	-0.767756	0.000269814	0.000435958
	TAG58:8-FA18:2	-0.625337	0.000285071	0.000459839
	TAG57:2-FA18:1	-0.774768	0.000291018	0.000468647
	PC(16:0/16:1)	-0.709876	0.000297676	0.000478568
	PC(16:0/20:2)	-0.378128	0.000317652	0.000509518
	PE(16:0/22:4)	-0.71755	0.000317986	0.000509518
	PE(18:0/22:5)	-0.616943	0.000321585	0.000514429
	TAG53:5-FA18:2	-0.0934803	0.000322827	0.000515559
	SM(14:0)	-0.39929	0.000338272	0.000539332
	TAG60:10-FA22:5	-0.663582	0.000344284	0.000548009
	PE(P-16:0/18:2)	-0.438607	0.000346402	0.00055047
	DAG(16:1/22:6)	-0.87394	0.000367558	0.000583128
	TAG55:8-FA20:4	-0.117718	0.000400717	0.000634688
	PE(P-16:0/20:4)	-0.422487	0.000406445	0.000642704
	TAG58:9-FA20:4	-0.760543	0.000435024	0.000686768
	MAG(18:1)	-0.64069	0.000450119	0.000709435
	TAG56:8-FA22:6	-0.782755	0.000453372	0.000713393
	PC(17:0/18:1)	-0.326105	0.000479464	0.000753221
	PC(14:0/22:6)	-0.421265	0.000487698	0.000764907
	PE(O-18:0/20:3)	-0.645121	0.000540254	0.000845959
	PC(16:0/18:1)	-0.330865	0.000549157	0.000858503
	TAG57:8-FA22:6	-0.656529	0.000553782	0.00086433
	DAG(18:2/22:5)	-0.563182	0.000595981	0.000928688
	PC(18:0/18:1)	-0.367925	0.000608355	0.00094644
	LPE(18:2)	-0.436477	0.000619147	0.000961675
	PC(15:0/18:2)	-0.425358	0.000644269	0.000998827
	TAG58:9-FA18:1	-0.735239	0.000645141	0.000998827
	TAG58:8-FA18:1	-0.708584	0.000717233	0.00110866
	PC(18:0/20:3)	-0.456934	0.000728912	0.00112326
	TAG56:9-FA22:6	-0.840319	0.000729014	0.00112326
	CER(22:0)	-0.36915	0.00078076	0.00120107
	CE(16:1)	-0.569699	0.000808667	0.00124202
	PE(18:0/16:0)	-0.332558	0.000823148	0.00126225
	TAG58:8-FA20:3	-0.700435	0.000831754	0.00127182
	PE(16:0/20:4)	-0.522178	0.000832033	0.00127182
	TAG58:8-FA22:5	-0.548048	0.000848851	0.00129547
	CE(18:4)	-0.616891	0.000857846	0.00130713
	PC(14:0/14:0)	-0.695515	0.000904697	0.00137634
	CER(14:0)	-0.248703	0.000919283	0.00139632
	LPC(20:2)	-0.368026	0.000943369	0.00143065
	DAG(18:2/20:3)	-0.608086	0.000990343	0.00149953
	DAG(18:1/22:6)	-0.750251	0.00100662	0.00152178
	PE(18:0/18:0)	-0.326084	0.00102629	0.00154909
	CER(24:0)	-0.362562	0.00106063	0.00159841
	LPE(18:0)	-0.346944	0.00117516	0.00176825
	TAG58:10-FA22:5	-0.665603	0.0011918	0.00179049
	PE(P-18:0/18:1)	-0.349152	0.00126976	0.00190464
	DCER(24:0)	-0.347591	0.00130527	0.00195486
	PE(18:0/22:6)	-0.533914	0.00135882	0.0020319
	DCER(22:1)	-0.167115	0.00168438	0.00251482
	TAG58:10-FA20:4	-0.710955	0.0017962	0.00267762
	DCER(18:0)	-0.351886	0.00193129	0.00287455
	MAG(14:0)	-0.263184	0.0019626	0.00291545
	PC(18:0/18:2)	-0.299505	0.00196483	0.00291545
	LPE(20:3)	-0.454441	0.00198091	0.0029348
	PI(18:0/18:1)	-0.46425	0.00217484	0.00321716
	TAG53:6-FA18:1	-0.091252	0.00221617	0.00327326
	CER(22:1)	-0.239583	0.00225158	0.00332048
	LPC(16:0)	-0.244558	0.00226435	0.00333421
	PE(P-16:0/22:5)	-0.42706	0.00231278	0.00340032
	TAG56:9-FA20:5	-0.756411	0.00233265	0.0034243
	CE(24:0)	-0.308472	0.00237422	0.00348002
	TAG58:8-FA22:6	-0.717925	0.00241276	0.00353114
	CE(16:0)	-0.267758	0.0024418	0.00356822
	CE(18:0)	-0.304029	0.00252348	0.00368198
	PC(18:2/18:3)	-0.348236	0.00258124	0.00376056
	PC(17:0/18:2)	-0.291221	0.00268999	0.00391308
	PE(O-16:0/20:3)	-0.46774	0.00286999	0.00416862
	TAG56:8-FA16:1	-0.624529	0.00302037	0.00438045
	LPE(16:1)	-0.471285	0.0033636	0.0048709
	TAG56:8-FA20:5	-0.656246	0.00340906	0.00492932
	DCER(24:1)	-0.184762	0.00351239	0.00507111
	PE(P-18:0/22:5)	-0.367061	0.00365764	0.00527292
	CE(20:3)	-0.369403	0.00371398	0.00534613
	PE(P-16:0/16:0)	-0.33102	0.00384057	0.0055201
	PC(18:2/20:4)	-0.271907	0.00391189	0.00561423
	PE(O-18:0/20:4)	-0.393906	0.00394412	0.00565207
	MAG(14:1)	-0.273009	0.00399909	0.00572232
	PE(18:1/16:1)	-0.481655	0.00421883	0.00602779
	PC(14:0/22:5)	-0.428099	0.00434779	0.00620285
	PC(16:0/12:0)	-0.536682	0.00458412	0.00653034
	PE(18:1/22:5)	-0.502814	0.00491873	0.00699665
	SM(20:0)	-0.220311	0.00508571	0.0072235
	LPE(16:0)	-0.274667	0.00515741	0.00731457
	PC(20:0/18:3)	-0.444388	0.00528182	0.00747999
	PC(18:0/22:4)	-0.405076	0.00554956	0.00784762
	DAG(18:2/20:5)	-0.679444	0.00560513	0.00791457
	LPC(18:3)	-0.436208	0.0057545	0.0081136
	PE(P-18:0/18:2)	-0.34183	0.00597392	0.00841065
	TAG60:10-FA22:6	-0.643571	0.00602675	0.00847265
	PE(16:0/22:5)	-0.524252	0.00613266	0.00860896
	LPC(18:0)	-0.235875	0.00626823	0.00878647
	PC(17:0/20:3)	-0.422495	0.0065245	0.00913241
	PE(P-18:1/22:5)	-0.335206	0.00669994	0.00936436
	PE(P-18:0/22:4)	-0.410665	0.00691979	0.00965761
	MAG(16:1)	-0.348778	0.00702874	0.00979548
	PC(14:0/16:1)	-0.476035	0.00713106	0.00992371
	PE(P-18:0/20:4)	-0.337038	0.00726608	0.010097
	TAG60:11-FA22:5	-0.606143	0.00774444	0.0107463
	PC(17:0/18:3)	-0.110637	0.00809652	0.0112186
	LPC(15:0)	-0.358236	0.00825093	0.0114162
	PE(P-16:0/22:4)	-0.353713	0.00862636	0.0119185
	PC(16:0/22:4)	-0.390606	0.00867607	0.01197
	PC(18:0/20:2)	-0.416581	0.00889944	0.0122606
	PE(P-18:1/18:2)	-0.324671	0.00901646	0.0124041
	MAG(18:4)	-0.187597	0.00905719	0.0124423
	HCER(26:0)	-0.224847	0.0091564	0.0125607
	PI(18:0/22:5)	-0.285076	0.00917861	0.0125733
	PC(15:0/20:4)	-0.335938	0.00950762	0.0130055
	TAG57:3-FA18:2	-0.575846	0.00978386	0.0133643
	DCER(20:0)	-0.187893	0.010048	0.0137057
	MAG(24:0)	-0.274637	0.0101897	0.0138794
	PC(16:0/20:4)	-0.285101	0.0104109	0.0141606
	MAG(20:3)	-0.202421	0.0107836	0.0146468
	PC(20:0/20:3)	-0.549979	0.0108255	0.014683
	PE(O-16:0/18:2)	-0.405072	0.0111153	0.0150549
	TAG58:10-FA22:6	-0.667239	0.0111749	0.0151143
	LPE(17:0)	-0.448106	0.0113452	0.0153232
	PC(14:0/18:3)	-0.296717	0.01162	0.0156723
	TAG60:11-FA22:6	-0.622827	0.0126744	0.0170705
	PE(P-18:1/18:1)	-0.266398	0.0129351	0.0173974
	MAG(18:2)	-0.371332	0.0131835	0.0177067
	TAG58:9-FA18:2	-0.533742	0.0134232	0.0180036
	PC(18:2/16:1)	-0.234094	0.0136024	0.0182185
	PE(O-18:0/22:4)	-0.333662	0.0137652	0.0184109
	CE(20:4)	-0.263361	0.0139622	0.0186486
	TAG55:7-FA20:4	-0.050464	0.014763	0.0196908
	PE(17:0/20:4)	-0.160918	0.0150567	0.0200547
	PI(18:1/18:1)	-0.432624	0.0152671	0.0203069
	PE(P-18:1/20:4)	-0.297795	0.0153824	0.020432
	TAG58:10-FA18:2	-0.549417	0.0157338	0.0208701
	CER(18:1)	-0.224163	0.0157991	0.0209278
	PC(18:0/12:0)	-0.487455	0.0160175	0.021188
	TAG58:10-FA20:5	-0.638053	0.0167653	0.0221467
	CE(20:2)	-0.250291	0.016877	0.0222638
	PC(18:1/16:1)	-0.277238	0.0173242	0.0228224
	PC(20:0/16:1)	-0.432961	0.0178025	0.0234205
	DAG(18:2/22:6)	-0.5689	0.0183686	0.0241323
	PE(O-18:0/22:5)	-0.375006	0.0184132	0.0241579
	LPE(18:3)	-0.427528	0.0188703	0.0247239
	PC(20:0/14:1)	-0.316659	0.0192625	0.0252035
	MAG(20:1)	-0.180451	0.0195992	0.0256093
	PC(16:0/18:0)	-0.355388	0.0197553	0.0257783
	MAG(22:0)	-0.142052	0.0208787	0.0272073
	CER(24:1)	-0.224777	0.0215523	0.0280471
	LPC(18:1)	-0.214148	0.0241389	0.0313708
	TAG58:9-FA22:6	-0.548621	0.024234	0.031452
	LCER(18:0)	-0.133268	0.0244104	0.0316383
	LCER(24:1)	0.22042	0.0251372	0.0325365
	PC(18:1/18:2)	-0.205009	0.0252887	0.0326887
	PE(18:0/20:1)	-0.290139	0.0253597	0.0327364
	TAG55:7-FA20:3	-0.0558629	0.0253999	0.0327445
	PE(O-16:0/22:4)	-0.449135	0.0258415	0.0332693
	PI(18:0/20:3)	-0.435595	0.0271875	0.0349553
	LPC(14:0)	-0.327587	0.0274431	0.0352369
	PE(P-16:0/20:5)	-0.446351	0.0279918	0.0358936
	PE(O-16:0/18:1)	-0.309036	0.0301397	0.0385964
	SM(22:0)	-0.148326	0.0306987	0.03926
	PC(12:0/18:1)	-0.337261	0.0307518	0.0392759
	PI(18:0/18:2)	-0.382693	0.0309168	0.0394342
	LPC(16:1)	-0.313313	0.0316804	0.0403548
	PC(18:2/18:2)	-0.269004	0.0320381	0.0407565
	MAG(18:3)	-0.15484	0.0321649	0.0408638
	LPC(17:0)	-0.221558	0.0345887	0.0438852
	MAG(22:2)	-0.149035	0.034757	0.0440408
	CE(22:0)	-0.198922	0.0349724	0.0442554
	LPE(22:5)	-0.305819	0.0350183	0.0442554
	PE(P-18:2/20:4)	-0.354275	0.0353623	0.0446316
	LCER(16:0)	0.175013	0.0372665	0.0469689
	PC(18:1/18:1)	-0.189244	0.0373421	0.0469689
	PC(17:0/16:1)	-0.281783	0.0373605	0.0469689
	PE(P-18:1/16:0)	-0.242673	0.0383241	0.0481175
	PC(16:0/20:1)	-0.19476	0.0389757	0.0488719
