# Supplementary material for: Network-based multi-omics integration reveals metabolic at-risk profile within treated HIV-infection
Source: eLife. 2023 Feb 16;12:e82785. doi: 10.7554/eLife.82785 (PMC10017104; doi:10.7554/eLife.82785)
Supplement: Supplementary file 2. [file elife-82785-supp2.xlsx]

## Sheet: Sheet1
Supplementary file 2. False discovery rate after differential metabolite analysis between the groups
Metabolites	SNF-1 vs SNF-2	SNF-1 vs SNF-3	SNF-2 vs SNF-3	Control vs SNF-1	Control vs SNF-2	Control vs SNF-3
N-acetylglutamate	0.201334	0.000255493	0.00291631	6.34483e-05	0.00565835	0.998299
N-acetyltaurine	0.0289919	0.000806416	0.272763	3.10607e-05	0.0747225	0.604078
linoleate (18:2n6)	0.100019	0.00104599	0.113094	0.0931317	0.857955	0.114554
dodecadienoate (12:2)*	0.195744	0.00104599	0.0214866	0.0682576	0.798513	0.130768
N6-succinyladenosine	0.0358385	0.00104599	0.328541	0.000321659	0.276486	0.92876
4-acetamidobutanoate	0.0358385	0.00114575	0.374722	5.32854e-05	0.103793	0.580632
1-palmitoyl-GPG (16:0)*	1	0.00148432	9.90105e-05	0.623974	0.589924	0.0123417
cis-4-decenoate (10:1n6)*	0.0580084	0.00148432	0.264947	0.158469	0.54696	0.0982674
3-hydroxy-3-methylglutarate	0.306228	0.00148432	0.0136718	5.17961e-05	0.00123923	0.47762
3,4-dihydroxybutyrate	0.306228	0.00148432	0.0143939	5.32854e-05	0.00149199	0.50188
eicosenoate (20:1n9 or 1n11)	0.0630656	0.00153451	0.283692	0.125501	0.634251	0.133575
linoleoylcarnitine (C18:2)*	0.0420153	0.00153451	0.467784	0.0101006	0.90953	0.629884
cytosine	0.389709	0.00153451	0.0120111	0.00807332	0.0969492	0.691682
sucrose	0.465114	0.00153451	0.00605054	0.00126318	0.0123312	1
pseudouridine	0.0757393	0.00218701	0.295594	0.000156785	0.0751316	0.580632
dihomolinoleate (20:2n6)	0.1362	0.00221083	0.161662	0.0738623	0.97722	0.257446
proline	0.953203	0.00224135	0.000399055	0.132379	0.129769	0.16347
sebacate (C10-DC)	0.12776	0.00237753	0.193509	0.0137365	0.58264	0.642131
oleate/vaccenate (18:1)	0.20015	0.0029023	0.113094	0.411726	0.607178	0.0562292
N-carbamoylaspartate	0.136762	0.00332443	0.208541	0.00436658	0.296836	0.952969
linolenate (18:3n3 or 3n6)	0.0572197	0.0037672	0.496496	0.360348	0.234009	0.0794706
7-methylguanine	0.0572197	0.00600214	0.574845	0.000975227	0.313291	0.727037
beta-citrylglutamate	0.965475	0.00688948	0.00112159	0.395452	0.42464	0.09701
gamma-glutamyltyrosine	0.195744	0.00696784	0.219308	0.00137214	0.0965955	0.742625
5,6-dihydrouridine	0.139388	0.00696784	0.312385	0.00407236	0.275602	0.944149
glucuronide of C10H18O2 (7)*	0.858895	0.0076938	0.00291631	0.5621	0.715892	0.0657659
1-carboxyethyltyrosine	0.662801	0.00883474	0.0133986	9.06044e-05	0.000178732	0.258527
4-acetylcatechol sulfate (1)	0.271032	0.00943256	0.154909	6.34483e-05	0.00257506	0.21092
3-amino-2-piperidone	0.0268395	0.0103537	0.992294	0.00125832	0.64399	0.629884
S-1-pyrroline-5-carboxylate	0.201334	0.0103537	0.262582	0.00470363	0.186888	0.873362
4-hydroxyphenylacetylglutamine	0.260127	0.0125578	0.197595	5.17961e-05	0.00191837	0.149155
dihydrocaffeate sulfate (2)	0.0572197	0.0164579	0.846693	1.9881e-05	0.0145061	0.0751114
1,2,3-benzenetriol sulfate (2)	0.464964	0.0174162	0.0963736	2.13543e-05	0.000105105	0.0783066
2-methoxyresorcinol sulfate	0.29447	0.0174162	0.200388	4.4207e-05	0.00117511	0.113407
N-acetylglucosamine/N-acetylgalactosamine	0.305409	0.0174162	0.192374	0.00108935	0.0277048	0.504033
o-cresol sulfate	0.260127	0.0174162	0.242445	0.00128821	0.0458479	0.535181
3-hydroxy-2-methylpyridine sulfate	0.375569	0.0180882	0.153999	2.13543e-05	0.000178732	0.0727948
N-acetylneuraminate	0.124986	0.0180882	0.589824	4.4207e-05	0.0102459	0.0989137
N-acetylglutamine	0.0572197	0.0180882	0.904029	4.4207e-05	0.0388716	0.10588
aconitate [cis or trans]	0.341388	0.0180882	0.182723	8.22724e-05	0.00169641	0.149608
3-ureidopropionate	0.140183	0.0180882	0.519731	0.000761732	0.0972841	0.396065
N4-acetylcytidine	0.465228	0.0180882	0.104131	0.000769215	0.00716553	0.402088
N-acetyl-beta-alanine	0.421583	0.0180882	0.145356	0.00113467	0.0146534	0.461519
gamma-glutamylphenylalanine	0.178119	0.0180882	0.465251	0.00152408	0.116441	0.536248
2-ethylphenylsulfate	0.178119	0.0180882	0.484141	0.00249304	0.165168	0.620292
1-oleoyl-GPG (18:1)*	0.551127	0.0182264	0.000118697	0.958735	0.573636	0.0197169
1-carboxyethylphenylalanine	0.665396	0.0182264	0.0369633	9.6065e-05	0.000178732	0.156246
1-carboxyethylisoleucine	0.944082	0.0182264	0.00723872	0.000239144	6.44898e-05	0.222994
2-hydroxyphenylacetate	0.301863	0.0182264	0.242445	0.000361626	0.0102939	0.267885
phenylacetylglycine	0.1362	0.0182264	0.583959	0.000507581	0.081336	0.311809
N-acetyltryptophan	0.124986	0.0182264	0.650136	0.000787377	0.128265	0.379872
3-(3-amino-3-carboxypropyl)uridine*	0.216548	0.0182264	0.37428	0.00248556	0.106394	0.598012
3-acetylphenol sulfate	0.301863	0.0182813	0.243106	9.05316e-09	6.32215e-08	0.000176258
docosahexaenoylcarnitine (C22:6)*	0.0743137	0.019237	0.883154	0.00108447	0.262931	0.403821
methylsuccinate	0.0467873	0.0195634	1	0.00161422	0.506873	0.492289
3-hydroxypyridine sulfate	0.241902	0.019896	0.346594	5.32854e-05	0.00256965	0.0982674
4-ethylcatechol sulfate	0.124986	0.020648	0.704909	0.000269183	0.0577876	0.215645
N6-carbamoylthreonyladenosine	0.136762	0.023103	0.680197	9.6065e-05	0.0214759	0.126624
guaiacol sulfate	0.264125	0.0232747	0.362954	2.13543e-05	0.000603743	0.0464142
N-acetylputrescine	0.271735	0.0247139	0.368884	0.000169596	0.00647006	0.149608
N-acetylhistidine	0.0630656	0.0273092	1	0.00130124	0.324015	0.357267
1-methyladenosine	0.0853675	0.0292102	0.953353	8.22724e-05	0.0406503	0.0982674
5-hydroxy-2-methylpyridine sulfate	0.477378	0.0321172	0.201257	1.73864e-05	5.89809e-05	0.0259787
2-hydroxyarachidate*	0.830417	0.0335465	0.00291631	0.909663	0.937754	0.0283168
N-acetylphenylalanine	0.136762	0.0335465	0.787563	6.55871e-05	0.0145061	0.0809272
erythronate*	0.483438	0.0335465	0.201799	0.000169596	0.00138671	0.121258
arachidonoylcarnitine (C20:4)	0.149633	0.0335465	0.751135	0.0014001	0.133085	0.321345
ribitol	0.269448	0.0335465	0.458456	0.00323916	0.0941852	0.471953
3-ethylcatechol sulfate (2)	0.229806	0.0338362	0.5056	8.62921e-05	0.0052104	0.0905352
kynurenine	0.178119	0.0338362	0.693746	0.00130124	0.106345	0.309548
C-glycosyltryptophan	0.0397437	0.0359116	0.751135	0.000485672	0.326185	0.200174
2-hydroxy-4-(methylthio)butanoic acid	0.216548	0.0359116	0.549506	0.00221023	0.0975827	0.378974
alpha-ketoglutarate	0.897091	0.0362666	0.00513139	8.62921e-05	1.71822e-06	0.0848683
sarcosine	0.96841	0.0364793	0.0192096	6.34483e-05	2.04051e-06	2.1785e-11
hexadecasphingosine (d16:1)*	0.712981	0.0412488	0.00192193	0.693329	0.313291	0.161763
3-hydroxypyridine glucuronide	0.185381	0.042112	0.724036	1.73864e-05	0.00123923	0.0204829
docosapentaenoylcarnitine (C22:5n3)*	0.124986	0.0433197	0.964141	0.000485672	0.101629	0.171662
4-acetylphenyl sulfate	0.521302	0.0461818	0.238562	0.00130124	0.00908156	0.259247
1-carboxyethylleucine	0.808702	0.0462598	0.00394808	0.00218199	0.0001049	0.319371
3-ethylcatechol sulfate (1)	0.149633	0.046582	0.869286	0.000589014	0.0766027	0.177005
catechol glucuronide	0.245037	0.0466476	0.570656	0.000227958	0.010611	0.10693
N-(2-furoyl)glycine	0.824193	0.0466919	0.0697676	0.000366457	0.000292948	0.136731
N-acetyltyrosine	0.211246	0.0481068	0.685058	0.00131757	0.0735786	0.256829
3-methyl catechol sulfate (2)	0.340713	0.0517103	0.468505	4.35927e-05	0.000608771	0.0324552
phenol sulfate	0.136762	0.0526063	0.945401	3.34878e-05	0.00565835	0.026334
caffeic acid sulfate	0.204789	0.0546061	0.748825	0.000361626	0.0260915	0.120389
maleate	0.201334	0.0564405	0.769598	9.38772e-06	0.000422623	0.00999154
gulonate*	0.287904	0.057122	0.560686	5.32854e-05	0.00169641	0.0407196
2,3-dihydroxypyridine	0.217855	0.06554	0.740905	0.00248556	0.102871	0.27602
2-oxindole-3-acetate	0.529983	0.0683213	0.305104	0.00219389	0.0145061	0.258527
3-methyl catechol sulfate (1)	0.375569	0.0784647	0.515555	0.000279196	0.00477327	0.0819712
5-acetylamino-6-formylamino-3-methyluracil	0.245037	0.0789793	0.751135	0.000883458	0.0363026	0.145109
1-stearoyl-GPG (18:0)	0.51183	0.0789793	0.00122721	0.745869	0.179247	0.221522
dihydroferulic acid sulfate	0.375569	0.0789793	0.51732	0.00304248	0.0458479	0.266352
citraconate/glutaconate	0.217855	0.084151	0.825261	8.26843e-06	0.000233646	0.00554284
1-carboxyethylvaline	0.818608	0.0911542	0.0133986	0.000865612	2.9442e-05	0.130211
pyruvate	0.855523	0.0952374	0.132413	0.000132499	6.44898e-05	0.0464142
glutamine conjugate of C6H10O2 (1)*	0.179348	0.0990651	1	0.000519406	0.0516202	0.09701
sphinganine	0.537832	0.103464	0.00291631	0.967833	0.542329	0.0994728
cortolone glucuronide (1)	0.700777	0.103464	0.243106	0.00213227	0.00477327	0.190709
orotate	0.102876	0.104722	0.771888	5.32854e-05	0.0224802	0.021105
indolelactate	0.299219	0.104722	0.751135	0.000883458	0.0244892	0.114865
phenol glucuronide	0.0757393	0.113536	0.650136	5.32854e-05	0.0330908	0.0204829
N-acetylalanine	0.299219	0.113536	0.782482	0.000430324	0.0129761	0.0789427
N-acetylvaline	0.51183	0.118002	0.49374	0.00471323	0.0325049	0.244403
N2,N2-dimethylguanosine	0.149633	0.120895	0.925999	2.13543e-05	0.00270501	0.00840186
lactate	0.772405	0.123959	0.0192096	0.00421841	0.000178732	0.221377
N-acetylisoleucine	0.772405	0.126796	0.243106	0.00160118	0.00245118	0.133589
5-hydroxymethyl-2-furoylcarnitine*	0.755479	0.128693	0.262582	0.00173076	0.00284141	0.135731
catechol sulfate	0.211246	0.129772	1	0.000321659	0.0207424	0.0517168
1-linoleoyl-GPG (18:2)*	0.32132	0.141089	0.00112159	0.291398	1	0.0118279
N-acetylleucine	0.636912	0.141089	0.425593	0.000361626	0.00117511	0.0517168
2-methoxyhydroquinone sulfate (2)	0.536067	0.151745	0.543981	0.00158381	0.0102459	0.112133
glycochenodeoxycholate glucuronide (1)	0.547689	0.155379	0.00605054	0.0921408	0.00407429	0.808697
glucuronate	0.603762	0.160643	0.499893	5.17961e-05	0.000127424	0.0118195
ergothioneine	0.125374	0.164681	0.704075	2.48992e-05	0.00545731	0.00554284
caffeine	0.252102	0.166954	1	1.19842e-08	2.36457e-07	1.24669e-06
N-acetylasparagine	0.341931	0.170013	0.864319	0.00399632	0.066929	0.162824
N-carbamoylalanine	0.55019	0.198315	0.630187	0.000169596	0.000923655	0.021105
tartronate (hydroxymalonate)	0.620618	0.198315	0.539467	0.000852779	0.00304577	0.0640747
3-hydroxyhippurate sulfate	0.514257	0.21511	0.720881	0.00037901	0.00258545	0.0324552
lamivudine	0.482737	0.218527	0.769598	0.000187171	0.00153753	0.0204829
N-acetylthreonine	0.658933	0.257532	0.583959	0.00496484	0.0147935	0.126624
cysteine-glutathione disulfide	0.617191	0.267518	0.66665	0.000361626	0.00125366	0.0241691
glycerophosphoethanolamine	0.299219	0.269314	0.00291631	0.902598	0.316766	0.205877
1,7-dimethylurate	0.300909	0.27937	0.959361	5.32854e-05	0.00149199	0.00554284
1,3,7-trimethylurate	0.282665	0.280431	0.926439	1.19842e-08	1.7795e-07	3.00227e-07
heptenedioate (C7:1-DC)*	0.125374	0.283742	0.490231	0.00218199	0.223204	0.0759271
glutamate	0.20015	0.283742	0.00112159	0.0228316	9.88335e-06	0.271795
gamma-glutamylglutamate	0.216548	0.283993	0.00150726	0.723902	0.0333158	0.60615
trigonelline (N'-methylnicotinate)	0.182308	0.293866	0.629739	0.00126628	0.0969492	0.0483323
metoprolol acid metabolite*	0.933648	0.329632	0.199658	9.25995e-08	7.75223e-11	1.24669e-06
3-(3-hydroxyphenyl)propionate sulfate	0.685083	0.346448	0.685058	0.00140833	0.00342069	0.0434034
cysteinylglycine	0.747136	0.353147	0.625003	0.0037257	0.00657028	0.0790818
N-acetylserine	0.306228	0.367851	0.860418	0.000787377	0.020551	0.0259787
3-hydroxyhippurate	0.61462	0.406459	0.873705	0.00231776	0.00979037	0.0483323
3-methylxanthine	0.548085	0.417731	0.966758	4.50832e-05	0.000151671	0.0012922
theophylline	0.375569	0.421393	0.891595	0.000366457	0.00633798	0.0121108
1-methylurate	0.47395	0.422955	1	0.000439219	0.00428328	0.0133348
paraxanthine	0.51183	0.425959	1	0.000608764	0.00463909	0.0176575
3-hydroxyadipate*	0.140183	0.474634	0.328541	0.00166132	0.166244	0.0283168
N1-methylinosine	0.514257	0.513411	0.964141	0.000361626	0.00245118	0.00840186
1,3-dimethylurate	0.216548	0.519911	0.488026	0.00307472	0.121101	0.0369828
indoleacetylglutamine	0.772405	0.540068	0.237752	0.0216052	0.00196256	0.13133
N-acetylglycine	0.0757393	0.616955	0.00112159	0.346922	0.000316147	0.728982
dihydroorotate	0.209791	0.68029	0.328541	0.000761732	0.0458479	0.00840186
carotene diol (2)	0.933998	0.745954	0.543981	0.00931919	0.00169641	0.0430543
deoxycholic acid 12-sulfate*	0.124986	0.749733	0.00485401	0.768993	0.127532	0.45251
palmitoyl-sphingosine-phosphoethanolamine (d18:1/16:0)	0.0358385	0.760247	0.0133986	0.61825	0.000345678	0.321345
phosphocholine	0.0140366	0.765032	0.00291631	0.163128	0.165396	0.315805
methyl indole-3-acetate	0.753848	0.77582	0.390539	0.0440676	0.00477327	0.118164
metoprolol	0.855328	0.799691	0.992294	4.4138e-13	3.22062e-16	6.03285e-15
alpha-hydroxymetoprolol	1	0.799691	0.769952	3.59364e-05	1.09539e-06	3.75452e-05
iminodiacetate (IDA)	0.602244	0.808307	0.735982	1.02022e-12	3.11967e-14	1.48104e-14
theobromine	0.828524	0.808307	0.5056	0.00503566	0.000316147	0.0197169
3-hydroxyoctanoate	0.810072	0.808307	0.49374	0.0359926	0.00477327	0.0905352
4-hydroxyglutamate	0.0434052	0.830658	0.00112159	0.533803	0.0864002	0.327342
succinoyltaurine	0.271735	0.890244	0.242445	0.00421841	0.10525	0.0118279
3,7-dimethylurate	0.676302	1	0.549841	0.0603113	0.00497705	0.0790818
