# Supplementary material for: Network-based multi-omics integration reveals metabolic at-risk profile within treated HIV-infection
Source: eLife. 2023 Feb 16;12:e82785. doi: 10.7554/eLife.82785 (PMC10017104; doi:10.7554/eLife.82785)
Supplement: Supplementary file 3. [file elife-82785-supp3.xlsx]

## Sheet: Sheet1
Supplementary file 3. Table of differential metabolite abundance analysis after adjustment of the CD4 count at sampling and route of transmission.
BIOCHEMICAL	logFC	P.Value	adj.P.Val	Comparision
N-acetylglutamate	-0.845334	3.85679e-07	0.000259948	SNF-3-SNF-1
dodecadienoate (12:2)*	1.19163	6.1925e-06	0.00110506
linoleate (18:2n6)	1.29606	7.29533e-06	0.00110506
cis-4-decenoate (10:1n6)*	1.53172	8.85723e-06	0.00110506
sucrose	-2.08692	1.06631e-05	0.00110506
N6-succinyladenosine	-0.895988	1.16337e-05	0.00110506
cytosine	-1.37012	1.23947e-05	0.00110506
3-hydroxy-3-methylglutarate	-0.748831	1.31165e-05	0.00110506
eicosenoate (20:1n9 or 1n11)	1.41855	1.74849e-05	0.00130943
caprate (10:0)	-1.16217	3.05703e-05	0.00206044
sebacate (C10-DC)	-1.18804	3.84723e-05	0.0023573
1-palmitoyl-GPG (16:0)*	-0.756369	4.74273e-05	0.00251282
3,4-dihydroxybutyrate	-0.697375	4.84668e-05	0.00251282
oleate/vaccenate (18:1)	1.14968	6.98336e-05	0.00336199
caprylate (8:0)	-0.946845	7.84263e-05	0.00348084
dihomolinoleate (20:2n6)	1.07041	8.26311e-05	0.00348084
1-carboxyethyltyrosine	-1.11637	9.89829e-05	0.00375661
N-carbamoylaspartate	-0.87599	0.000100325	0.00375661
2,3-dihydroxyisovalerate	-1.85175	0.000132726	0.00456308
linolenate (18:3n3 or 3n6)	1.36616	0.000135403	0.00456308
hexadecadienoate (16:2n6)	1.36353	0.000158646	0.00509179
N-palmitoylserine	-0.733193	0.000181286	0.00555395
cis-4-decenoylcarnitine (C10:1)	0.765827	0.000193761	0.00567805
glucuronide of C10H18O2 (7)*	-2.55559	0.00030784	0.00864519
docosahexaenoate (DHA; 22:6n3)	1.02493	0.000333383	0.00898801
4-acetylcatechol sulfate (1)	-1.62245	0.000374789	0.00971569
3-ureidopropionate	-0.704324	0.000505474	0.0126181
N-acetylglutamine	-0.707602	0.00059121	0.0131999
docosahexaenoylcarnitine (C22:6)*	1.0769	0.000593624	0.0131999
glycochenodeoxycholate	-1.37247	0.000593691	0.0131999
1-carboxyethylisoleucine	-0.780969	0.000629903	0.0131999
5-hydroxyhexanoate	-0.905235	0.000648478	0.0131999
glycocholate	-1.36329	0.000658933	0.0131999
tetradecadienoate (14:2)*	1.08604	0.000679602	0.0131999
1-carboxyethylphenylalanine	-0.759032	0.00069579	0.0131999
maltol sulfate	-1.80653	0.000705038	0.0131999
1,2,3-benzenetriol sulfate (2)	-2.07784	0.000763781	0.0136087
linolenoylcarnitine (C18:3)*	0.641252	0.000777979	0.0136087
2-methoxyresorcinol sulfate	-1.89532	0.00080828	0.0136087
4-ethylphenyl sulfate	-0.978341	0.000811994	0.0136087
4-hydroxyphenylacetylglutamine	-0.792431	0.000827827	0.0136087
o-cresol sulfate	-1.80391	0.000883361	0.0139384
3-acetylphenol sulfate	-1.56587	0.000892676	0.0139384
branched-chain, straight-chain, or cyclopropyl 10:1 fatty acid (1)*	-1.03489	0.000909923	0.0139384
quinolinate	-0.587838	0.00101104	0.0148604
3-methoxycatechol sulfate (1)	-1.47904	0.00101421	0.0148604
phenylacetylglycine	-1.23706	0.00104709	0.0150158
N,N-dimethyl-5-aminovalerate	-1.28892	0.00121839	0.0171083
acetoacetate	0.966384	0.00129715	0.0176745
3-hydroxy-2-methylpyridine sulfate	-2.09504	0.00133411	0.0176745
taurocholate	-1.78114	0.00133946	0.0176745
5-hydroxymethyl-2-furoic acid	-1.09499	0.00137478	0.0176745
4-vinylguaiacol sulfate	-1.68293	0.00138984	0.0176745
taurochenodeoxycholate	-1.5854	0.00149656	0.0186793
dihydrocaffeate sulfate (2)	-1.98407	0.00154501	0.0189334
ferulic acid 4-sulfate	-1.48218	0.00161777	0.019471
ethyl glucuronide	-1.73657	0.00165331	0.0195497
pyrraline	-0.921621	0.00181398	0.0210797
docosapentaenoate (DPA; 22:5n3)	0.886469	0.00195848	0.022348
4-acetylphenyl sulfate	-0.913834	0.00198944	0.022348
1-oleoyl-GPG (18:1)*	-0.716092	0.00222081	0.0245381
undecanedioate (C11-DC)	-0.52006	0.00235346	0.0255844
N4-acetylcytidine	-0.470916	0.00244785	0.0257116
glucuronide of C14H26O4 (1)*	-1.00254	0.00245655	0.0257116
eicosapentaenoate (EPA; 20:5n3)	0.885428	0.0024796	0.0257116
N-acetylphenylalanine	-0.617824	0.00259531	0.0265036
4-ethylcatechol sulfate	-1.46911	0.00275252	0.0276895
2-ethylphenylsulfate	-1.81693	0.0028935	0.0277966
dodecanedioate (C12)	-0.917442	0.00289644	0.0277966
nicotinamide riboside	-1.36645	0.00294477	0.0277966
2-hydroxyphenylacetate	-0.503244	0.0029803	0.0277966
margarate (17:0)	0.670877	0.00301016	0.0277966
guaiacol sulfate	-0.958021	0.00301061	0.0277966
3-hydroxypyridine sulfate	-1.64489	0.00318991	0.0290541
docosadienoate (22:2n6)	0.707476	0.00336512	0.0300368
3-hydroxybutyrate (BHBA)	0.969079	0.00338693	0.0300368
adrenate (22:4n6)	0.513676	0.00363897	0.0318528
docosapentaenoate (n6 DPA; 22:5n6)	0.788111	0.00386136	0.0330774
2-hydroxy-3-methylvalerate	-0.571312	0.00387702	0.0330774
ethyl beta-glucopyranoside	-1.31456	0.00393524	0.0331544
palmitate (16:0)	0.619776	0.00414177	0.0344636
branched-chain, straight-chain, or cyclopropyl 12:1 fatty acid*	1.00155	0.00436018	0.0358385
2-hydroxyarachidate*	-0.566989	0.00447757	0.0363601
1-carboxyethylleucine	-0.578527	0.00504582	0.0404867
arachidonate (20:4n6)	0.645222	0.00513198	0.0406935
10-heptadecenoate (17:1n7)	0.95845	0.00526032	0.0412262
glycochenodeoxycholate 3-sulfate	-1.09893	0.0055389	0.0428087
docosapentaenoylcarnitine (C22:5n3)*	0.69339	0.00558926	0.0428087
myristoleoylcarnitine (C14:1)*	0.773073	0.00585116	0.0435521
5-hydroxy-2-methylpyridine sulfate	-2.01762	0.00585512	0.0435521
phenyllactate (PLA)	-0.461282	0.00593191	0.0435521
O-acetylhomoserine	-0.944374	0.00594479	0.0435521
2-oxindole-3-acetate	-0.795725	0.00604064	0.0437784
3-hydroxydecanoylcarnitine	0.757128	0.00624679	0.0447908
N-acetyltyrosine	-0.610739	0.0066209	0.0466745
3-decenoylcarnitine	0.575923	0.006648	0.0466745
glycoursodeoxycholic acid sulfate (1)	-1.32313	0.00679014	0.047181
2-hydroxy-4-(methylthio)butanoic acid	-0.525676	0.00749698	0.0508912
caffeic acid sulfate	-1.44018	0.00760404	0.0508912
palmitoleate (16:1n7)	1.13188	0.00760941	0.0508912
glucuronide of C10H18O2 (1)*	-1.36292	0.00765173	0.0508912
cotinine	-3.25263	0.00770164	0.0508912
3-ethylcatechol sulfate (2)	-1.33387	0.00790864	0.0517517
butyrylglycine (C4)	-0.564976	0.00839185	0.0540943
glycoursodeoxycholate	-1.25684	0.00842715	0.0540943
N-(2-furoyl)glycine	-1.61957	0.00869369	0.0552787
catechol glucuronide	-1.22675	0.00881414	0.0555209
docosatrienoate (22:3n3)	0.845243	0.00925543	0.0577607
stearidonate (18:4n3)	1.43638	0.00939105	0.0580694
3-ethylcatechol sulfate (1)	-1.42355	0.0097206	0.059195
orotate	-0.426375	0.00974873	0.059195
3-methyl catechol sulfate (2)	-1.52234	0.00997367	0.0600201
ethylmalonate	-0.528409	0.0104181	0.0618602
(2,4 or 2,5)-dimethylphenol sulfate	-1.59547	0.010463	0.0618602
3-hydroxypyridine glucuronide	-1.77831	0.0107589	0.0625572
hexadecasphingosine (d16:1)*	-0.933157	0.0108463	0.0625572
1-carboxyethylvaline	-0.507378	0.0108593	0.0625572
sulfate of piperine metabolite C18H21NO3 (3)*	0.921124	0.011028	0.0629902
1-linoleoyl-GPA (18:2)*	-0.513628	0.0113632	0.0643597
gulonate*	-0.462626	0.0128576	0.0722169
hydroxycotinine	-1.55257	0.0131498	0.0727575
3-methyl catechol sulfate (1)	-1.4259	0.0131698	0.0727575
pantoate	-0.521823	0.0136543	0.0748211
pentadecanoate (15:0)	0.511441	0.0142324	0.0773598
arabonate/xylonate	-0.489088	0.0150722	0.0812693
heneicosapentaenoate (21:5n3)	1.36495	0.0152031	0.0813244
glutamine conjugate of C6H10O2 (1)*	-0.661851	0.0154514	0.0820021
2-hydroxyglutarate	-0.459364	0.015674	0.0825336
maleate	-0.72056	0.0161831	0.0843026
methyl vanillate sulfate	-0.995432	0.016345	0.0843026
2-naphthol sulfate	-1.10443	0.0163852	0.0843026
cytidine	-0.757645	0.0168349	0.0851067
galactonate	-0.959031	0.0168814	0.0851067
THC carboxylic acid	-0.602053	0.017068	0.0851067
sulfate of piperine metabolite C18H21NO3 (1)*	0.945516	0.017171	0.0851067
lactobacillic acid	0.7418	0.0171729	0.0851067
decanoylcarnitine (C10)	0.640683	0.0176203	0.086687
1-methylhistidine	0.751838	0.0180278	0.0870352
taurochenodeoxycholic acid 3-sulfate	-1.23949	0.0180279	0.0870352
octanoylcarnitine (C8)	0.60168	0.0180785	0.0870352
tartarate	-1.65166	0.0182713	0.0873394
tetradecanedioate (C14)	-0.603653	0.0188699	0.0895656
2,3-dihydroxypyridine	-1.22118	0.019125	0.0901417
oleoyl ethanolamide	0.515058	0.0195677	0.0915879
10-nonadecenoate (19:1n9)	0.666091	0.0201592	0.0937055
dihydroferulic acid sulfate	-1.16668	0.0204445	0.0943808
5-acetylamino-6-formylamino-3-methyluracil	-1.34208	0.0217909	0.099602
androstenediol (3beta,17beta) disulfate (1)	-0.793828	0.0218711	0.099602
sulfate of piperine metabolite C18H21NO3 (3)*	1.55339	2.31088e-05	0.0155753	SNF-2-SNF-1
linolenoylcarnitine (C18:3)*	0.729473	0.000115249	0.0323018
sulfate of piperine metabolite C18H21NO3 (1)*	1.51643	0.000143777	0.0323018
piperine	2.24795	0.000195065	0.0328684
nicotinamide riboside	-1.59434	0.000463325	0.0453874
4-cholesten-3-one	0.522761	0.000469903	0.0453874
sulfate of piperine metabolite C16H19NO3 (2)*	1.70309	0.000545341	0.0453874
cis-4-decenoate (10:1n6)*	1.13561	0.000605622	0.0453874
sulfate of piperine metabolite C16H19NO3 (3)*	1.60966	0.000606063	0.0453874
linolenate (18:3n3 or 3n6)	1.13079	0.00114455	0.0702716
indoleacetoylcarnitine*	1.28734	0.00120715	0.0702716
N6-succinyladenosine	-0.632141	0.00125113	0.0702716
glucuronide of piperine metabolite C17H21NO3 (4)*	1.52011	0.00160458	0.0831913
benzoate	-0.644284	0.00181005	0.0871411
glucuronide of piperine metabolite C17H21NO3 (5)*	1.29222	0.0019627	0.0881908
1-palmitoyl-GPG (16:0)*	-0.779958	7.99843e-07	0.000539094	SNF-3 vs SNF-2
1-linoleoyl-GPG (18:2)*	-0.934828	5.49137e-06	0.00185059
1-oleoyl-GPG (18:1)*	-0.878671	1.12439e-05	0.00252612
sphinganine	-0.730404	2.53357e-05	0.00426906
N-acetylglycine	0.558453	4.4333e-05	0.00597609
2-hydroxyarachidate*	-0.673545	7.04106e-05	0.0070468
1-stearoyl-GPG (18:0)	-0.862097	8.32662e-05	0.0070468
AMP	-0.983703	8.36416e-05	0.0070468
N-acetylglutamate	-0.524635	9.68535e-05	0.00725325
hexadecasphingosine (d16:1)*	-1.20122	0.000116185	0.00783086
glutamate	-0.573302	0.000154832	0.00948697
spermine	-0.676815	0.000169194	0.00950309
sucrose	-1.42094	0.000249179	0.012919
4-hydroxyglutamate	-1.02229	0.000285678	0.0137533
sphingosine	-0.698849	0.000345903	0.0140795
1-carboxyethylleucine	-0.622156	0.000347626	0.0140795
cytosine	-0.914298	0.000360657	0.0140795
3-phosphoglycerate	-0.64084	0.000376012	0.0140795
deoxycholic acid 12-sulfate*	-1.67306	0.00042985	0.0152483
glycochenodeoxycholate glucuronide (1)	-1.1689	0.000468529	0.0157894
maltose	-1.10527	0.000586328	0.0188183
glucuronide of C10H18O2 (7)*	-2.00938	0.000619879	0.0189909
1-carboxyethyltyrosine	-0.788591	0.000832704	0.0244018
trans-2-hexenoylglycine	0.88458	0.000874485	0.0245584
N-palmitoylserine	-0.535179	0.000926009	0.0249652
1-carboxyethylisoleucine	-0.623966	0.000999476	0.0259095
N-oleoylserine	-0.549613	0.00109237	0.0264401
glucuronide of piperine metabolite C17H21NO3 (5)*	-1.15617	0.00111466	0.0264401
caprate (10:0)	-0.740799	0.00113763	0.0264401
glucuronide of piperine metabolite C17H21NO3 (3)*	-1.17789	0.00142732	0.032067
3-hydroxy-3-methylglutarate	-0.443617	0.00147562	0.0320829
gamma-glutamylglutamate	-0.425738	0.00160337	0.0337709
1-carboxyethylvaline	-0.524521	0.00170727	0.0339468
maltol sulfate	-1.3851	0.00171245	0.0339468
pyrraline	-0.761406	0.00194408	0.0374374
piperine	-1.55714	0.00205701	0.0385117
3,4-dihydroxybutyrate	-0.425701	0.00236124	0.0430129
3-hydroxydecanoylcarnitine	0.689499	0.00286278	0.0507766
propionylcarnitine (C3)	-0.448726	0.0029665	0.0512671
4-cholesten-3-one	-0.370238	0.00316473	0.0533258
glycolithocholate	-1.10691	0.00352457	0.0579404
caprylate (8:0)	-0.563515	0.00395647	0.0622854
pimeloylcarnitine/3-methyladipoylcarnitine (C7-DC)	0.574569	0.0039737	0.0622854
5-hydroxyhexanoate	-0.628486	0.00407405	0.062407
5alpha-androstan-3alpha,17beta-diol 17-glucuronide	-0.572898	0.00444189	0.0665297
sphingadienine	-0.459063	0.00465487	0.068204
1-linoleoyl-GPA (18:2)*	-0.476639	0.00491849	0.0694685
N-stearoyltaurine	-0.648586	0.00494731	0.0694685
1-carboxyethylphenylalanine	-0.504772	0.00613872	0.0844387
arachidoylcarnitine (C20)*	-0.388565	0.00626648	0.0844722
homoarginine	-0.38058	0.00651751	0.0861334
5-hydroxylysine	-0.55628	0.00704693	0.091339
N-acetylcitrulline	-0.890087	0.00762256	0.0969359
