# Supplementary material for: Network-based multi-omics integration reveals metabolic at-risk profile within treated HIV-infection
Source: eLife. 2023 Feb 16;12:e82785. doi: 10.7554/eLife.82785 (PMC10017104; doi:10.7554/eLife.82785)
Supplement: Table 1—source data 1. [file elife-82785-table1-data1.xlsx]

## Sheet: Sheet1
Table 1-source data 1: Comparative characteristics of the HC and PLWH
	Healthy Controls	Complete Cohort	P values
N	20	97
Age in years, Median (IQR)	56 (51-67)	54 (48-63)	0.62
Gender, Male, N (%)	18 (90)	84 (87)	1
BMI, Median (IQR)	26 (23-29)	24 (22-27)	0.04
