# Supplementary material for: Network-based multi-omics integration reveals metabolic at-risk profile within treated HIV-infection
Source: eLife. 2023 Feb 16;12:e82785. doi: 10.7554/eLife.82785 (PMC10017104; doi:10.7554/eLife.82785)
Supplement: Table 1—source data 2. [file elife-82785-table1-data2.xlsx]

## Sheet: Sheet1
Table 1-source data 2: Non-significant characteristics between the cohorts.
	Complete Cohort	SNF-1	SNF- 2	SNF-3	P values
N	97	19	44	34
Beef intake, Times per week in average	2(1-2)	2(1-2)	2(1-2)	2(1-2)	0.58
Poultry intake, Times per week in average	2(1-2)	2(1-2)	2(1-2)	2(1-2)	0.96
Fruit intake (whole fruit/portion of fruit)	5(5.21%)	2(10.53%)	3(6.82%)	0(0%)	0.25
0-3 /month	47(48.96%)	9(47.37%)	24(54.55%)	14(42.42%)
1-6 /week	44(45.83%)	8(42.11%)	17(38.64%)	19(57.58%)
1 –more 3/day
Vegetable intake	7(7.29%)				0.84
0-3 /month	48(50%)	2(10.53%)	3(6.98%)	2(5.88%)
1-6 /week	41(42.71%)	10(52.63%)	23(53.49%)	15(44.12%)
1 –more 3/day		7(36.84%)	17(39.53%)	17(50%)
Choice of fat for preparing warm dishes					0.92
None	4(4.82%)	1(6.67%)	1(2.56%)	2(6.9%)
Butter	14(16.87%)	3(20%)	6(15.38%)	5(17.24%)
Vegetable margarine (Plantemargarine)	14(16.87%)	3(20%)	6(15.38%)	5(17.24%)
Olive oil	30(36.14%)	5(33.33%)	17(43.59%)	8(27.59%)
Other oil	21(25.3%)	3(20%)	9(23.08%)	9(31.03%)
Physical activity in spare time					0.09
Inactive	6(6.19%)	2(10.53%)	4(9.09%)	0(0%)
Slightly active	28(28.87%)	5(26.32%)	14(31.82%)	9(26.47%)
Moderately active	53(54.64%)	10(52.63%)	25(56.82%)	18(52.94%)
Very active	10(10.31%)	2(10.53%)	1(2.27%)	7(20.59%)
Alcohol, Weekly consumption, in grams	84(36-144)	96(48-126)	72(42-186)	60(15-108)	0.33
Cumulative smoking, Pack years in current and previous smokers	12.5(4.12-29.38)	15(11-26.35)	15(4.62-34.61)	6.3(2.3-17.5)	0.29
Diabetes, N (%)	2(2)	0(0%)	0(0%)	2(5.88%)	0.16
Estimated glomerular function rate (eGFR)	87.2 (76.7-95.8)	86 (73.2-94.6)	87.6(78.2-94.1)	87.5(72.8-96.3)	0.9
Alanine aminotransferase (ALAT)	26 (20-34)	26 (18-33.5)	28 (20.5-36)	21.5 (19.3-32.8)	0.23
